# Supplementary material
Source: PubMed Central journal article supplement (PMC9558423)
Supplement: NIHMS1778808-supplement-supplementary_material.pdf [file NIHMS1778808-supplement-supplementary_material.pdf]

## **SUPPORTING INFORMATION – FIGURES AND TABLES**

Table SI-1 – Mass spectrometry parameters for compounds quantified via MS<sup>2</sup>.

Figure SI-1-14 – Urinary excretion of phenolic acids.\*

Figure SI-15-18 – Urinary excretion of flavonols.\*

Figure SI-19-35 – Urinary excretion of anthocyanins.\*

Figure SI-36 – Total urinary excretion of anthocyanins over 48h.

Figure SI-37-38 – Urinary excretion of hippuric acids.\*

Figure SI-39-45 – Plasma pharmacokinetics.\*

\* Graphs in figures SI 1-35 and SI-37-38 depict urinary excretion of polyphenol metabolites, while graphs in figures SI-39-45 show plasma concentrations of polyphenol metabolites. For clarity, statistical comparisons are shown in tables below each figure. Lower case letters indicate differences between doses and the same time point (i.e., down a column), while upper case letters indicate differences between time points and within dose (i.e., across a row). Two-way ANOVA with Tukey's HSD ( $p < 0.05$ ) used for all comparisons. nd = not detected; trace = metabolite detected but below LOQ. Data shown as mean  $\pm$  SEM in graphs; mean  $\pm$  SD in tables.

Table SI-1 – Mass spectrometry parameters for compounds quantified via MS<sup>2</sup>.

| Compound     | MRM mode | RT (min) | MW    | Precursor ion (m/z) | MS <sup>2</sup> fragments (m/z) <sup>a</sup> | CV  | CE (eV) | Quantitation Standard   |
|--------------|----------|----------|-------|---------------------|----------------------------------------------|-----|---------|-------------------------|
| Anthocyanins |          |          |       |                     |                                              |     |         |                         |
| Cyanidin     |          |          |       |                     |                                              |     |         |                         |
| Arabinoside  | +        | 1.77     | 419.1 | 419                 | 287                                          | 46  | 20      | Cyanidin-3-glucoside    |
| Galactoside  | +        | 1.41     | 449.1 | 449                 | 137, 287                                     | 46  | 54, 20  |                         |
| Glucoside    | +        | 1.62     | 449.1 | 449                 | 137, 287                                     | 46  | 54, 20  |                         |
| Glucuronide  | +        | 1.8      | 463.1 | 464                 | 287                                          | 35  | 20      |                         |
| Delphinidin  |          |          |       |                     |                                              |     |         |                         |
| Arabinoside  | +        | 1.41     | 435.4 | 435                 | 303                                          | 100 | 18      | Delphinidin-3-glucoside |
| Galactoside  | +        | 1.12     | 465.4 | 465                 | 69, 303                                      | 100 | 74, 18  |                         |
| Glucoside    | +        | 1.24     | 465.4 | 465                 | 69, 303                                      | 100 | 74, 18  |                         |
| Glucuronide  | +        | 3.2      | 479.4 | 479                 | 303                                          | 100 | 18      |                         |
| Sulfate      | +        | 4.11     | 383.4 | 383                 | 153, 303                                     | 100 | 54, 18  |                         |
| Malvidin     |          |          |       |                     |                                              |     |         |                         |
| Arabinoside  | +        | 2.79     | 463.4 | 463                 | 331                                          | 100 | 34      | Malvidin-3-glucoside    |
| Galactoside  | +        | 2.4      | 493.4 | 493                 | 315, 331                                     | 100 | 50, 34  |                         |
| Glucoside    | +        | 2.63     | 493.4 | 493                 | 315, 331                                     | 100 | 50, 34  |                         |
| Peonidin     |          |          |       |                     |                                              |     |         |                         |
| Arabinoside  | +        | 2.44     | 433.4 | 433                 | 301                                          | 35  | 20      | Peonidin-3-glucoside    |
| Galactoside  | +        | 2.11     | 463.4 | 464                 | 301                                          | 35  | 20      |                         |
| Glucoside    | +        | 2.4      | 463.4 | 464                 | 301                                          | 35  | 20      |                         |
| Glucuronide  | +        | 4.28     | 477.4 | 477                 | 301                                          | 35  | 20      |                         |
| Sulfate      | +        | 4.24     | 381.4 | 381                 | 301                                          | 35  | 20      |                         |
| Petunidin    |          |          |       |                     |                                              |     |         |                         |
| Arabinoside  | +        | 2.13     | 449.4 | 449                 | 317                                          | 40  | 22      | Petunidin-3-glucoside   |
| Galactoside  | +        | 1.69     | 479.4 | 479                 | 317                                          | 40  | 22      |                         |
| Glucoside    | +        | 1.91     | 479.4 | 479                 | 317                                          | 40  | 22      |                         |
| Glucuronide  | +        | 3.77     | 493.4 | 493                 | 317                                          | 40  | 22      |                         |
| Sulfate      | +        | 4.26     | 397.4 | 397                 | 317                                          | 40  | 22      |                         |

Supporting Information for *Colonic metabolism of blueberry phenolics*

Phenolic Acids

|                              |   |      |       |     |          |    |        |                          |  |
|------------------------------|---|------|-------|-----|----------|----|--------|--------------------------|--|
| Benzaldehydes (BALD)         |   |      |       |     |          |    |        |                          |  |
| 4-OH-BALD                    | - | 1.70 | 126   | 121 | 65, 92   | 44 | 22, 24 | 4-OH-BALD                |  |
| 3-OH-4-OMe-BALD              | - | 2.30 | 150.2 | 151 | 92, 136  | 24 | 22, 12 | 3-OH-4-OMe-BALD          |  |
| Benzoic acids (BzA)          |   |      |       |     |          |    |        |                          |  |
| Protocatechuic acid          | - | 0.86 | 154.1 | 153 | 81, 91   | 28 | 18, 24 | Protocatechuic acid      |  |
| Gallic acid                  | - | 0.61 | 170.1 | 169 | 79, 97   | 32 | 22, 20 | Gallic acid              |  |
| 3-OH-4-OMe-BzA               | - | 1.64 | 168.1 | 167 | 108, 152 | 28 | 20, 12 | 3-OH-4-OMe-BzA           |  |
| Syringic acid                | - | 1.91 | 198.2 | 197 | 123, 182 | 36 | 24, 14 | Syringic acid            |  |
| BzA sulfate                  | - | 3.93 | 202.1 | 201 | 121      | 28 | 12     | 4-OH-BALD                |  |
| BzA glucuronide              | - | 3.81 | 298.2 | 297 | 121      | 30 | 22     | 4-OH-BALD                |  |
| Phenyl Acetic Acids (PAA)    |   |      |       |     |          |    |        |                          |  |
| 4-OH-PAA                     | - | 1.52 | 152.2 | 151 | 107, 133 | 28 | 10     | 4-OH-PAA                 |  |
| 3-OMe-PAA                    | - | 3.62 | 166.2 | 165 | 106, 121 | 28 | 24, 6  | 3-OMe-PAA                |  |
| 3-OH-4-OMe-PAA               | - | 2.35 | 182.2 | 181 | 79, 122  | 14 | 16, 12 | 3-OH-4-OMe-PAA           |  |
| Phenyl Propionic Acids (PPA) |   |      |       |     |          |    |        |                          |  |
| 3-OH-PPA                     | - | 2.82 | 166.2 | 165 | 121, 147 | 24 | 16, 12 | 3-OH-PPA                 |  |
| 3-OH-4-OMe-PPA               | - | 3.24 | 196.2 | 195 | 135, 136 | 32 | 26, 12 | 3-OH-4-OMe-PPA           |  |
| <i>trans</i> -Cinnamic Acids |   |      |       |     |          |    |        |                          |  |
| <i>p</i> -Coumaric acid      | - | 2.41 | 164   | 163 | 93, 120  | 28 | 28, 32 | <i>p</i> -Coumaric acid  |  |
| Caffeic acid                 | - | 1.62 | 180.2 | 179 | 107, 117 | 32 | 22, 24 | Caffeic acid             |  |
| Caffeic acid sulfate         | - | 4.35 | 260.2 | 259 | 179      | 32 | 12     | Caffeic acid             |  |
| Caffeic acid glucuronide     | - | 1.46 | 356.2 | 355 | 179      | 30 | 18     | Caffeic acid glucuronide |  |
| Ferulic acid                 | - | 3.12 | 194.2 | 193 | 134, 178 | 30 | 18, 12 | Ferulic acid             |  |
| Ferulic acid sulfate         | - | 1.82 | 274.2 | 273 | 134, 193 | 30 | 18, 12 | Ferulic acid             |  |
| Ferulic acid glucuronide     | - | 3.51 | 370.2 | 369 | 193      | 30 | 22     | Ferulic acid             |  |
| Chlorogenic acid             | - | 1.49 | 354.3 | 353 | 85, 191  | 26 | 40, 18 | Chlorogenic acid         |  |
| Feruloylquinic acid          | - | 2.64 | 368.3 | 367 | 134, 191 | 30 | 40, 20 | Ferulic acid             |  |
| Ethyl gallate                | - | 2.62 | 198.2 | 197 | 124, 125 | 30 | 30     | Ethyl gallate            |  |
| Taxifolin                    | - | 3.19 | 304.3 | 303 | 125, 177 | 34 | 22, 14 | Taxifolin                |  |
| Catechins                    |   |      |       |     |          |    |        |                          |  |
| Catechin                     | - | 1.40 | 290.3 | 289 | 109, 123 | 33 | 24, 26 | Catechin                 |  |

Supporting Information for *Colonic metabolism of blueberry phenolics*

|                                 |   |      |       |     |                 |    |        |                       |
|---------------------------------|---|------|-------|-----|-----------------|----|--------|-----------------------|
| Epicatechin                     | - | 2.11 | 290.3 | 289 | <i>109, 123</i> | 33 | 24, 26 | Epicatechin           |
| (Epi)gallocatechin peak 1       | - | 0.80 | 306.3 | 305 | <i>125, 179</i> | 40 | 20, 14 | Catechin              |
| (Epi)gallocatechin peak 2       | - | 1.00 | 306.3 | 305 | <i>125, 179</i> | 40 | 20, 14 | Catechin              |
| Flavonols                       |   |      |       |     |                 |    |        |                       |
| Quercetin                       | - | 4.19 | 302.2 | 301 | <i>151, 179</i> | 38 | 20, 18 | Quercetin             |
| Kaempferol                      | - | 4.52 | 286.2 | 285 | <i>146, 151</i> | 58 | 30, 18 | Quercetin             |
| Myricetin                       | - | 3.79 | 318.2 | 317 | <i>151, 179</i> | 46 | 26, 20 | Myricetin             |
| Kaempferol-3-glycs <sup>b</sup> | - | 1.40 | 448.4 | 447 | <i>284</i>      | 42 | 18     | Quercetin-3-glucoside |
| Quercetin-3-glycs               | - | 3.39 | 464.1 | 463 | <i>271, 300</i> | 42 | 40, 24 | Quercetin-3-glucoside |
| Quercetin-3-rutinoside          | - | 3.41 | 610.2 | 609 | <i>300</i>      | 42 | 24     | Quercetin             |
| Quercetin glucuronide           | - | 3.46 | 478.1 | 477 | <i>151, 300</i> | 42 | 38, 22 | Quercetin glucuronide |
| 4-OMe-quercetin                 | - | 4.62 | 316.2 | 315 | <i>151, 300</i> | 28 | 32, 20 | 4-OMe-quercetin       |
| Me-quercetin glucuronide        | - | 3.80 | 492.1 | 491 | <i>151, 315</i> | 42 | 38, 22 | Quercetin glucuronide |
| Hippuric Acids                  |   |      |       |     |                 |    |        |                       |
| Hippuric acid                   | - | 1.58 | 179.2 | 178 | <i>56, 77</i>   | 28 | 12, 16 | Hippuric acid         |
| 3-OH-hippuric acid              | - | 1.04 | 195.2 | 194 | <i>93, 121</i>  | 32 | 22, 24 | 3-OH-hippuric acid    |

MRM = Multiple Reaction Monitoring; RT = retention time; MW = molecular weight; CV = cone voltage; CE = collision energy.

<sup>a</sup> Daughter fragments monitored; fragment listed in italics used for quantitation.

<sup>b</sup> Galactoside and glucoside peaks overlapped and were not distinguishable, so quantitated as sum of both peaks.

Figure SI-1 – Urinary excretion of syringic acid.

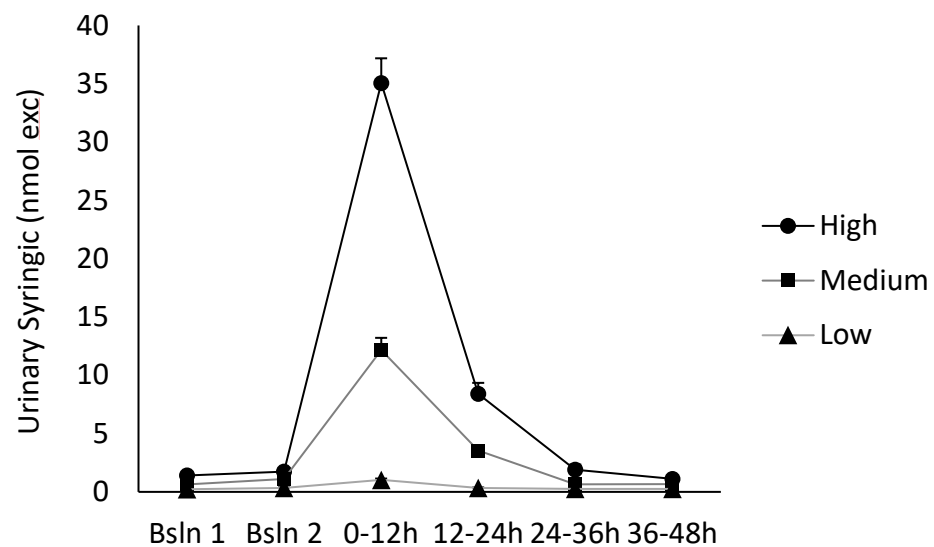

|         | Bsln 1                    | Bsln 2                    | 0-12h                      | 12-24h                    | 24-36h                    | 36-48h                    |
|---------|---------------------------|---------------------------|----------------------------|---------------------------|---------------------------|---------------------------|
| Control | nd                        | nd                        | nd                         | nd                        | nd                        | nd                        |
| Low     | 0.23 ± 0.09 <sup>aB</sup> | 0.35 ± 0.11 <sup>aB</sup> | 1.03 ± 0.3 <sup>aA</sup>   | 0.35 ± 0.09 <sup>aB</sup> | 0.25 ± 0.06 <sup>aB</sup> | 0.27 ± 0.09 <sup>aB</sup> |
| Medium  | 0.65 ± 0.34 <sup>bC</sup> | 1.12 ± 0.59 <sup>bC</sup> | 12.16 ± 2.95 <sup>bA</sup> | 3.55 ± 0.92 <sup>bB</sup> | 0.65 ± 0.4 <sup>bC</sup>  | 0.65 ± 0.29 <sup>bC</sup> |
| High    | 1.39 ± 0.58 <sup>cC</sup> | 1.74 ± 0.59 <sup>cC</sup> | 35.06 ± 6 <sup>cA</sup>    | 8.41 ± 2.65 <sup>cB</sup> | 1.9 ± 1.25 <sup>cC</sup>  | 1.12 ± 0.28 <sup>cC</sup> |

Figure SI-2 – Urinary excretion of benzoic acid glucuronide.

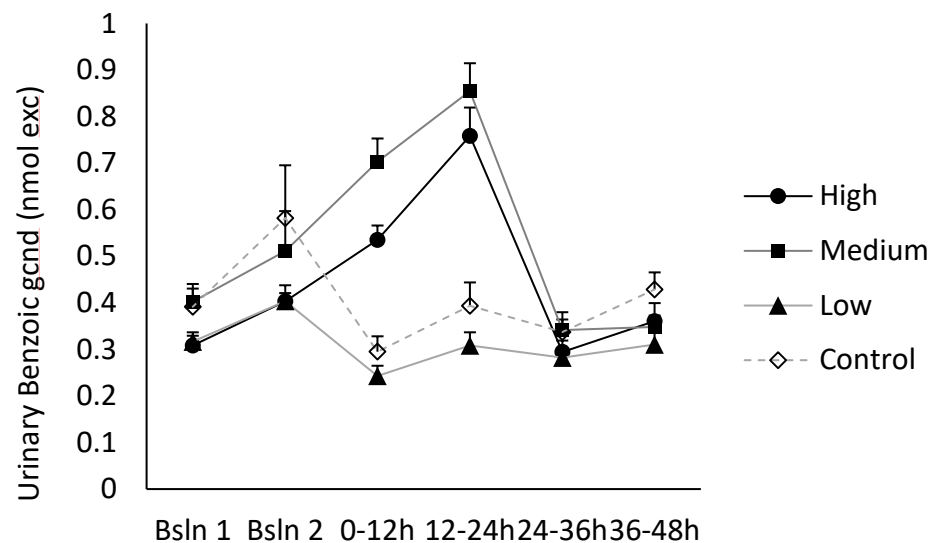

|         | Bsln 1                   | Bsln 2                   | 0-12h                     | 12-24h                      | 24-36h                    | 36-48h                    |
|---------|--------------------------|--------------------------|---------------------------|-----------------------------|---------------------------|---------------------------|
| Control | 0.39 ± 0.14 <sup>A</sup> | 0.58 ± 0.32 <sup>A</sup> | 0.3 ± 0.09 <sup>bC</sup>  | 0.39 ± 0.14 <sup>bABC</sup> | 0.34 ± 0.12 <sup>BC</sup> | 0.43 ± 0.1 <sup>AB</sup>  |
| Low     | 0.32 ± 0.04 <sup>A</sup> | 0.4 ± 0.05 <sup>A</sup>  | 0.24 ± 0.06 <sup>bB</sup> | 0.31 ± 0.08 <sup>bAB</sup>  | 0.28 ± 0.05 <sup>AB</sup> | 0.31 ± 0.07 <sup>AB</sup> |
| Medium  | 0.4 ± 0.08 <sup>B</sup>  | 0.51 ± 0.24 <sup>B</sup> | 0.7 ± 0.14 <sup>aA</sup>  | 0.85 ± 0.17 <sup>aA</sup>   | 0.34 ± 0.06 <sup>B</sup>  | 0.35 ± 0.07 <sup>B</sup>  |
| High    | 0.31 ± 0.08 <sup>C</sup> | 0.4 ± 0.1 <sup>C</sup>   | 0.54 ± 0.09 <sup>aB</sup> | 0.76 ± 0.17 <sup>aA</sup>   | 0.29 ± 0.07 <sup>C</sup>  | 0.36 ± 0.1 <sup>C</sup>   |

Figure SI-3 – Urinary excretion of benzoic acid sulfate.

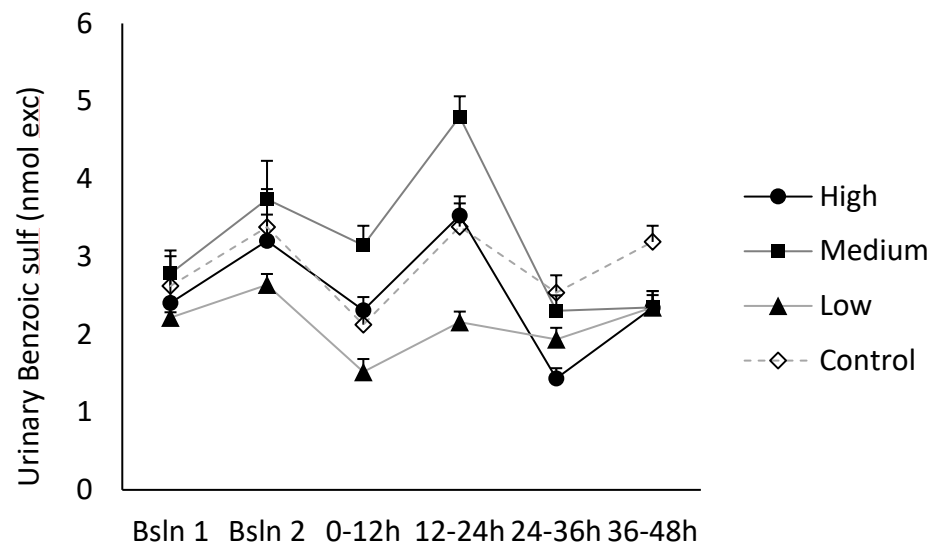

|         | Bsln 1                    | Bsln 2                    | 0-12h                      | 12-24h                    | 24-36h                      | 36-48h                    |
|---------|---------------------------|---------------------------|----------------------------|---------------------------|-----------------------------|---------------------------|
| Control | 2.62 ± 1.09 <sup>AB</sup> | 3.38 ± 1.3 <sup>AB</sup>  | 2.13 ± 0.59 <sup>bA</sup>  | 3.39 ± 0.85 <sup>bB</sup> | 2.54 ± 0.63 <sup>aAB</sup>  | 3.19 ± 0.59 <sup>B</sup>  |
| Low     | 2.21 ± 0.2 <sup>A</sup>   | 2.64 ± 0.39 <sup>A</sup>  | 1.52 ± 0.44 <sup>cB</sup>  | 2.16 ± 0.38 <sup>cA</sup> | 1.93 ± 0.42 <sup>abAB</sup> | 2.35 ± 0.6 <sup>A</sup>   |
| Medium  | 2.78 ± 0.83 <sup>B</sup>  | 3.74 ± 1.39 <sup>B</sup>  | 3.15 ± 0.71 <sup>Abc</sup> | 4.8 ± 0.74 <sup>aA</sup>  | 2.3 ± 0.56 <sup>aD</sup>    | 2.35 ± 0.59 <sup>CD</sup> |
| High    | 2.41 ± 0.87 <sup>AB</sup> | 3.21 ± 0.95 <sup>AB</sup> | 2.31 ± 0.48 <sup>abB</sup> | 3.53 ± 0.7 <sup>abA</sup> | 1.43 ± 0.37 <sup>bC</sup>   | 2.34 ± 0.43 <sup>B</sup>  |

Figure SI-4 – Urinary excretion of 4-hydroxyphenyl acetic acid.

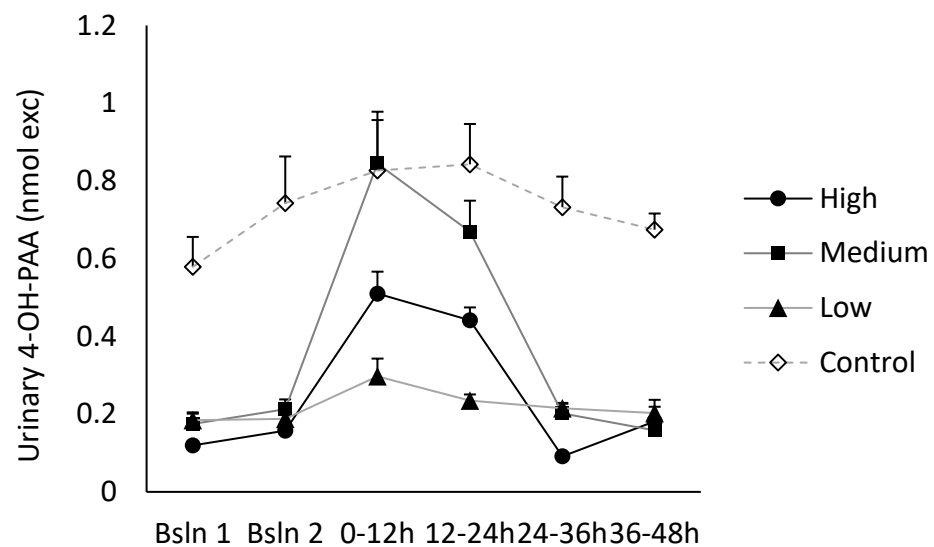

|         | Bsln 1                     | Bsln 2                     | 0-12h                     | 12-24h                     | 24-36h                    | 36-48h                    |
|---------|----------------------------|----------------------------|---------------------------|----------------------------|---------------------------|---------------------------|
| Control | 0.58 ± 0.22 <sup>a</sup>   | 0.74 ± 0.34 <sup>a</sup>   | 0.83 ± 0.37 <sup>ab</sup> | 0.84 ± 0.29 <sup>a</sup>   | 0.73 ± 0.22 <sup>a</sup>  | 0.67 ± 0.12 <sup>a</sup>  |
| Low     | 0.18 ± 0.05 <sup>b</sup>   | 0.19 ± 0.04 <sup>b</sup>   | 0.3 ± 0.12 <sup>c</sup>   | 0.23 ± 0.04 <sup>c</sup>   | 0.21 ± 0.04 <sup>b</sup>  | 0.2 ± 0.05 <sup>b</sup>   |
| Medium  | 0.17 ± 0.08 <sup>bB</sup>  | 0.21 ± 0.07 <sup>bB</sup>  | 0.84 ± 0.38 <sup>aA</sup> | 0.67 ± 0.23 <sup>abA</sup> | 0.2 ± 0.07 <sup>bB</sup>  | 0.16 ± 0.08 <sup>bB</sup> |
| High    | 0.12 ± 0.03 <sup>bBC</sup> | 0.16 ± 0.05 <sup>bBC</sup> | 0.51 ± 0.16 <sup>bA</sup> | 0.44 ± 0.09 <sup>bA</sup>  | 0.09 ± 0.02 <sup>cC</sup> | 0.18 ± 0.15 <sup>bB</sup> |



Figure SI-5 – Urinary excretion of homovanillic acid/isohomovanillic acid.

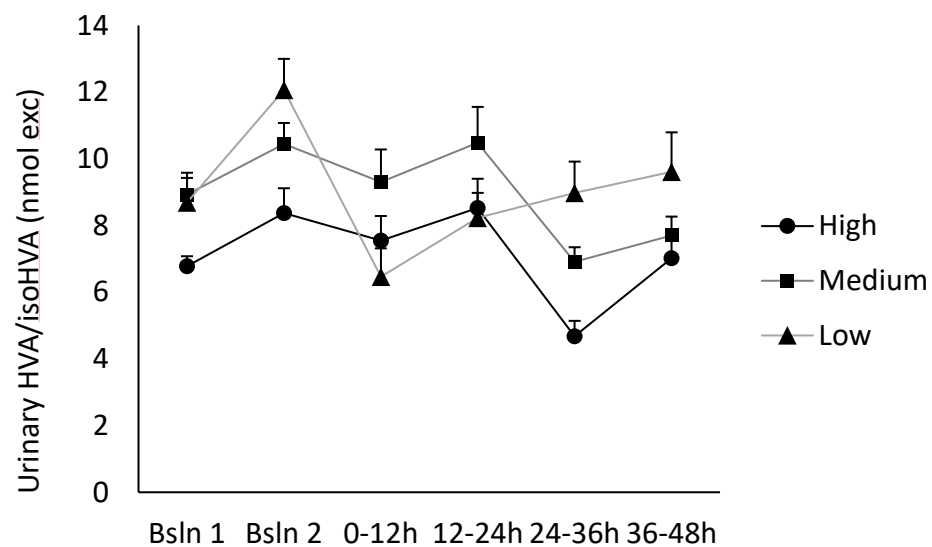

|         | Bsln 1                    | Bsln 2                      | 0-12h                      | 12-24h                     | 24-36h                    | 36-48h                   |
|---------|---------------------------|-----------------------------|----------------------------|----------------------------|---------------------------|--------------------------|
| Control | nd                        | nd                          | nd                         | nd                         | nd                        | nd                       |
| Low     | 8.69 ± 2.07 <sup>aA</sup> | 12.07 ± 2.64 <sup>aA</sup>  | 6.46 ± 2.25 <sup>bB</sup>  | 8.23 ± 2.12 <sup>aAB</sup> | 8.98 ± 2.66 <sup>AB</sup> | 9.61 ± 3.34 <sup>A</sup> |
| Medium  | 8.93 ± 1.83 <sup>Ab</sup> | 10.45 ± 1.66 <sup>abA</sup> | 9.31 ± 2.75 <sup>aAB</sup> | 10.48 ± 3.04 <sup>aA</sup> | 6.91 ± 1.24 <sup>B</sup>  | 7.7 ± 1.61 <sup>AB</sup> |
| High    | 6.78 ± 0.84 <sup>bA</sup> | 8.37 ± 1.97 <sup>bA</sup>   | 7.55 ± 2.08 <sup>abA</sup> | 8.53 ± 2.48 <sup>bA</sup>  | 4.68 ± 1.31 <sup>B</sup>  | 7.02 ± 1.77 <sup>A</sup> |

Figure SI-6 – Urinary excretion of 3-hydroxyphenyl propionic acid.

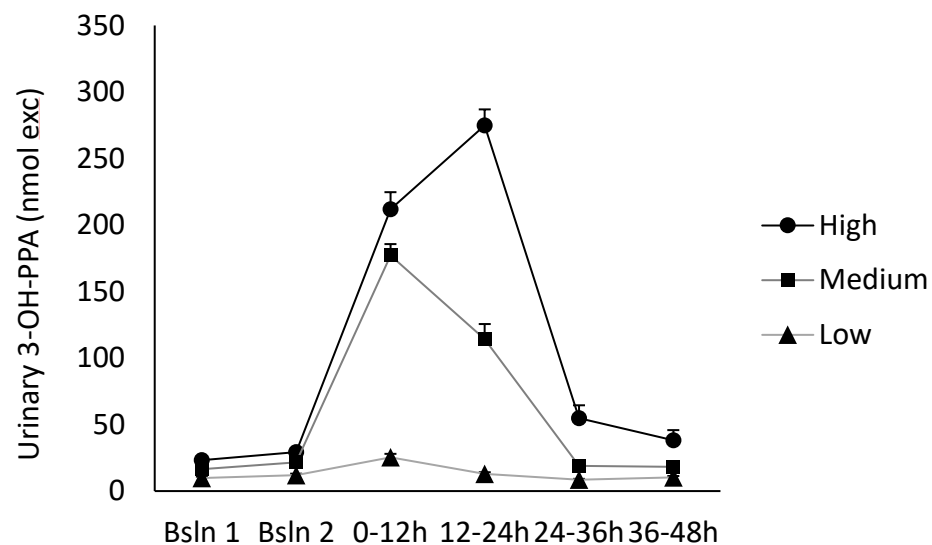

|         | Bsln 1                     | Bsln 2                     | 0-12h                        | 12-24h                       | 24-36h                      | 36-48h                      |
|---------|----------------------------|----------------------------|------------------------------|------------------------------|-----------------------------|-----------------------------|
| Control | nd                         | nd                         | nd                           | nd                           | nd                          | nd                          |
| Low     | 9.69 ± 3.33 <sup>CB</sup>  | 12.08 ± 2.85 <sup>CB</sup> | 25.37 ± 6.93 <sup>BA</sup>   | 12.91 ± 3.53 <sup>CB</sup>   | 8.54 ± 1.81 <sup>CB</sup>   | 10.4 ± 2.64 <sup>CB</sup>   |
| Medium  | 16.45 ± 5.88 <sup>BC</sup> | 21.53 ± 6.99 <sup>BC</sup> | 177.12 ± 24.15 <sup>AA</sup> | 114.11 ± 32.43 <sup>BB</sup> | 18.96 ± 5.23 <sup>BC</sup>  | 18.17 ± 5.44 <sup>BC</sup>  |
| High    | 23.24 ± 7.67 <sup>AC</sup> | 29.18 ± 9.16 <sup>AC</sup> | 211.81 ± 36.43 <sup>AA</sup> | 274.82 ± 34.15 <sup>AA</sup> | 54.68 ± 27.76 <sup>AB</sup> | 38.07 ± 20.5 <sup>ABC</sup> |

Figure SI-7 – Urinary excretion of 3-hydroxy-4-methoxyphenyl propionic acid.

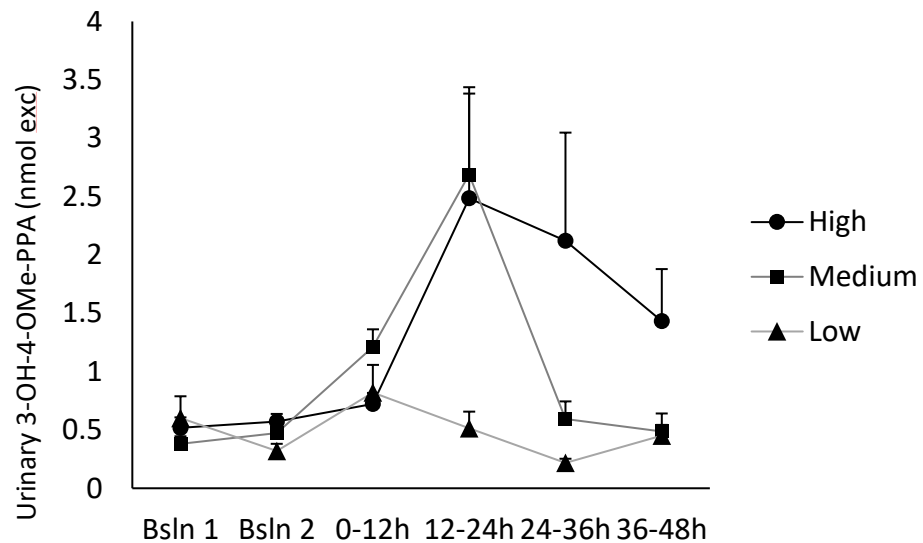

|         | Bsln 1                   | Bsln 2                    | 0-12h                     | 12-24h                     | 24-36h                     | 36-48h                     |
|---------|--------------------------|---------------------------|---------------------------|----------------------------|----------------------------|----------------------------|
| Control | nd                       | nd                        | nd                        | nd                         | nd                         | nd                         |
| Low     | 0.6 ± 0.42 <sup>AB</sup> | 0.32 ± 0.17 <sup>AB</sup> | 0.82 ± 0.58 <sup>A</sup>  | 0.51 ± 0.38 <sup>bAB</sup> | 0.22 ± 0.09 <sup>b</sup>   | 0.45 ± 0.46 <sup>b</sup>   |
| Medium  | 0.38 ± 0.18 <sup>B</sup> | 0.47 ± 0.22 <sup>B</sup>  | 1.21 ± 0.43 <sup>A</sup>  | 2.69 ± 1.83 <sup>aA</sup>  | 0.59 ± 0.42 <sup>bB</sup>  | 0.49 ± 0.16 <sup>bB</sup>  |
| High    | 0.52 ± 0.25 <sup>B</sup> | 0.57 ± 0.19 <sup>B</sup>  | 0.72 ± 0.27 <sup>AB</sup> | 2.48 ± 2.69 <sup>aA</sup>  | 2.12 ± 2.45 <sup>aAB</sup> | 1.43 ± 1.09 <sup>aAB</sup> |

Figure SI-8 – Urinary excretion of chlorogenic acid.

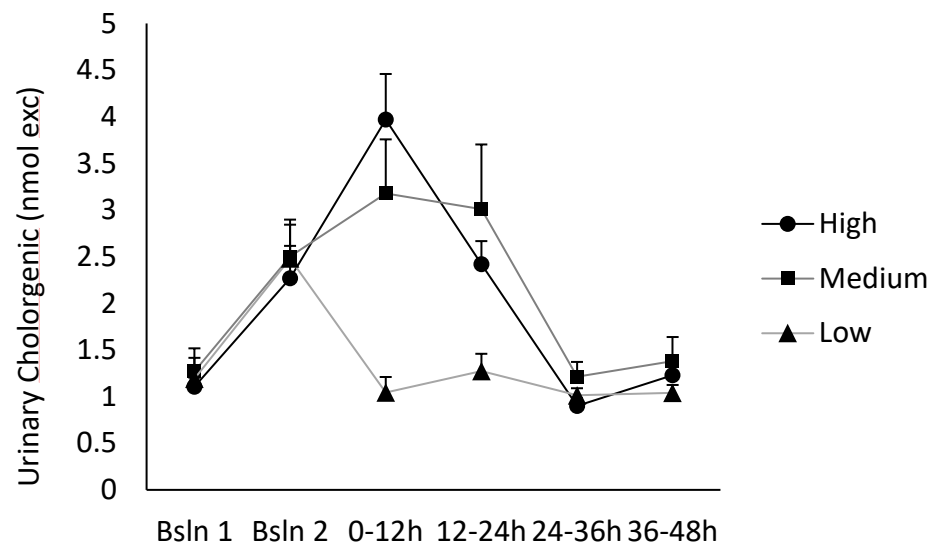

|         | Bsln 1                   | Bsln 2                   | 0-12h                     | 12-24h                    | 24-36h                   | 36-48h                    |
|---------|--------------------------|--------------------------|---------------------------|---------------------------|--------------------------|---------------------------|
| Control | nd                       | nd                       | nd                        | nd                        | nd                       | nd                        |
| Low     | 1.19 ± 0.64 <sup>B</sup> | 2.48 ± 1.03 <sup>A</sup> | 1.04 ± 0.44 <sup>bB</sup> | 1.27 ± 0.52 <sup>bB</sup> | 1.01 ± 0.21 <sup>B</sup> | 1.04 ± 0.24 <sup>B</sup>  |
| Medium  | 1.27 ± 0.7 <sup>B</sup>  | 2.5 ± 1.12 <sup>A</sup>  | 3.18 ± 1.64 <sup>aA</sup> | 3.01 ± 1.97 <sup>aA</sup> | 1.21 ± 0.45 <sup>B</sup> | 1.38 ± 0.73 <sup>B</sup>  |
| High    | 1.11 ± 0.27 <sup>C</sup> | 2.27 ± 0.98 <sup>B</sup> | 3.97 ± 1.38 <sup>aA</sup> | 2.42 ± 0.7 <sup>aAB</sup> | 0.9 ± 0.24 <sup>D</sup>  | 1.23 ± 0.34 <sup>CD</sup> |

Figure SI-9 – Urinary excretion of caffeic acid.

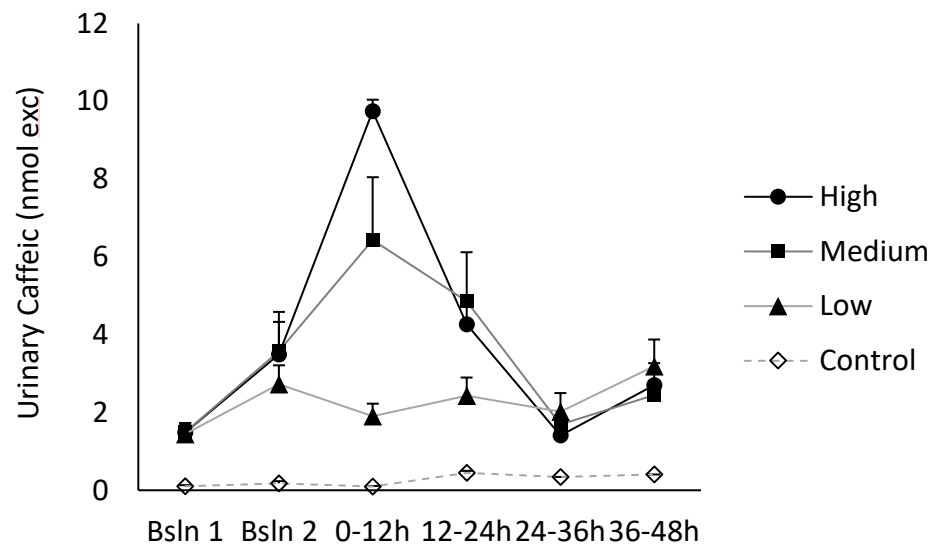

|         | Bsln 1                    | Bsln 2                     | 0-12h                     | 12-24h                     | 24-36h                    | 36-48h                     |
|---------|---------------------------|----------------------------|---------------------------|----------------------------|---------------------------|----------------------------|
| Control | 0.11 ± 0.06 <sup>b</sup>  | 0.18 ± 0.11 <sup>b</sup>   | 0.1 ± 0.02 <sup>c</sup>   | 0.45 ± 0.07 <sup>b</sup>   | 0.34 ± 0.06 <sup>b</sup>  | 0.41 ± 0.07 <sup>b</sup>   |
| Low     | 1.45 ± 0.78 <sup>a</sup>  | 2.73 ± 1.37 <sup>a</sup>   | 1.9 ± 0.85 <sup>b</sup>   | 2.43 ± 1.32 <sup>a</sup>   | 2.02 ± 1.35 <sup>a</sup>  | 3.19 ± 1.94 <sup>a</sup>   |
| Medium  | 1.49 ± 0.67 <sup>aC</sup> | 3.57 ± 2.13 <sup>aBC</sup> | 6.43 ± 4.57 <sup>aA</sup> | 4.86 ± 3.57 <sup>aAB</sup> | 1.69 ± 0.59 <sup>aC</sup> | 2.44 ± 1.05 <sup>aBC</sup> |
| High    | 1.48 ± 0.55 <sup>aC</sup> | 3.49 ± 3.09 <sup>aBC</sup> | 9.74 ± 0.78 <sup>aA</sup> | 4.27 ± 1.66 <sup>aB</sup>  | 1.41 ± 0.88 <sup>aC</sup> | 2.7 ± 1.49 <sup>aBC</sup>  |

Figure SI-10 – Urinary excretion of caffeic acid glucuronide.

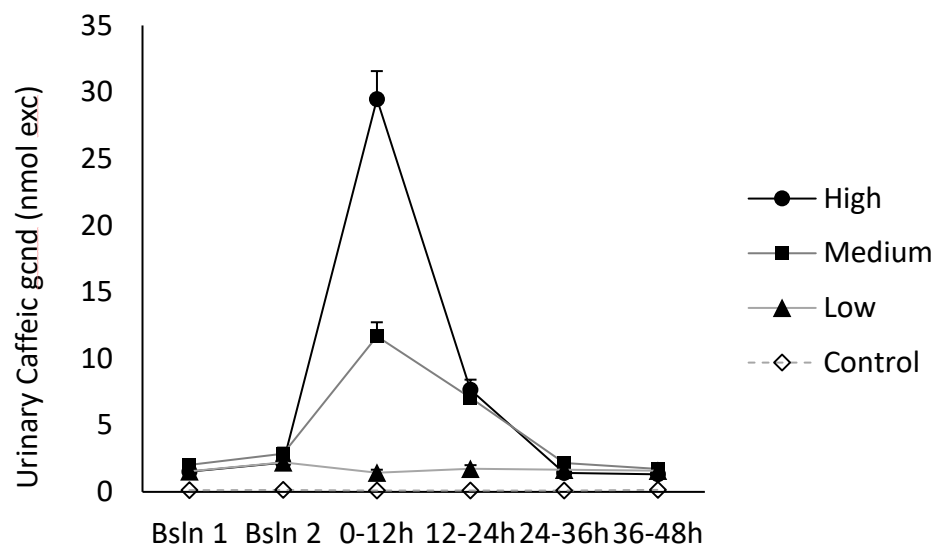

|         | Bsln 1                    | Bsln 2                    | 0-12h                      | 12-24h                    | 24-36h                    | 36-48h                    |
|---------|---------------------------|---------------------------|----------------------------|---------------------------|---------------------------|---------------------------|
| Control | 0.12 ± 0.03 <sup>b</sup>  | 0.14 ± 0.04 <sup>b</sup>  | 0.1 ± 0.03 <sup>d</sup>    | 0.11 ± 0.05 <sup>c</sup>  | 0.1 ± 0.03 <sup>b</sup>   | 0.14 ± 0.05 <sup>b</sup>  |
| Low     | 1.55 ± 0.42 <sup>a</sup>  | 2.22 ± 0.95 <sup>a</sup>  | 1.44 ± 0.59 <sup>c</sup>   | 1.73 ± 0.78 <sup>b</sup>  | 1.67 ± 0.6 <sup>a</sup>   | 1.59 ± 0.76 <sup>a</sup>  |
| Medium  | 2.03 ± 0.27 <sup>aC</sup> | 2.86 ± 1.29 <sup>aC</sup> | 11.67 ± 2.98 <sup>bA</sup> | 7.07 ± 1.73 <sup>aB</sup> | 2.17 ± 0.7 <sup>aC</sup>  | 1.72 ± 0.32 <sup>aC</sup> |
| High    | 1.52 ± 0.49 <sup>aC</sup> | 2.19 ± 0.59 <sup>aC</sup> | 29.48 ± 5.93 <sup>aA</sup> | 7.67 ± 2.13 <sup>aB</sup> | 1.42 ± 0.48 <sup>aC</sup> | 1.32 ± 0.63 <sup>aC</sup> |

Figure SI-11 – Urinary excretion of caffeic acid sulfate.

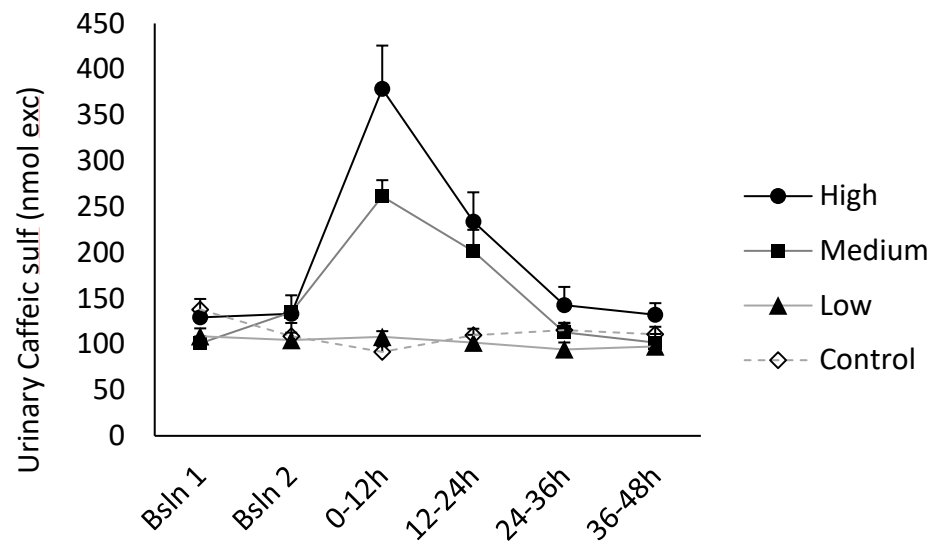

|         | Bsln 1                    | Bsln 2                    | 0-12h                       | 12-24h                     | 24-36h                     | 36-48h                    |
|---------|---------------------------|---------------------------|-----------------------------|----------------------------|----------------------------|---------------------------|
| Control | 137.8 ± 32.9              | 108.9 ± 40.4              | 91.6 ± 17.5                 | 109.9 ± 19.8               | 115.5 ± 22.2 <sup>ab</sup> | 110.8 ± 23.2              |
| Low     | 108.7 ± 24.3              | 104.4 ± 23.1              | 108 ± 16.6                  | 101.8 ± 23.8               | 94.3 ± 21.5 <sup>b</sup>   | 97.6 ± 16.9               |
| Medium  | 101 ± 21.2 <sup>B</sup>   | 134.8 ± 52.6 <sup>B</sup> | 261.3 ± 50.1 <sup>aA</sup>  | 201.2 ± 66.8 <sup>aA</sup> | 113 ± 27.6 <sup>abB</sup>  | 101.7 ± 26.7 <sup>B</sup> |
| High    | 129.2 ± 17.3 <sup>C</sup> | 133.1 ± 18.9 <sup>C</sup> | 378.5 ± 133.9 <sup>aA</sup> | 233.7 ± 90.6 <sup>ab</sup> | 142.6 ± 56.2 <sup>aC</sup> | 132.2 ± 33.2 <sup>C</sup> |

Figure SI-12 – Urinary excretion of ferulic acid.

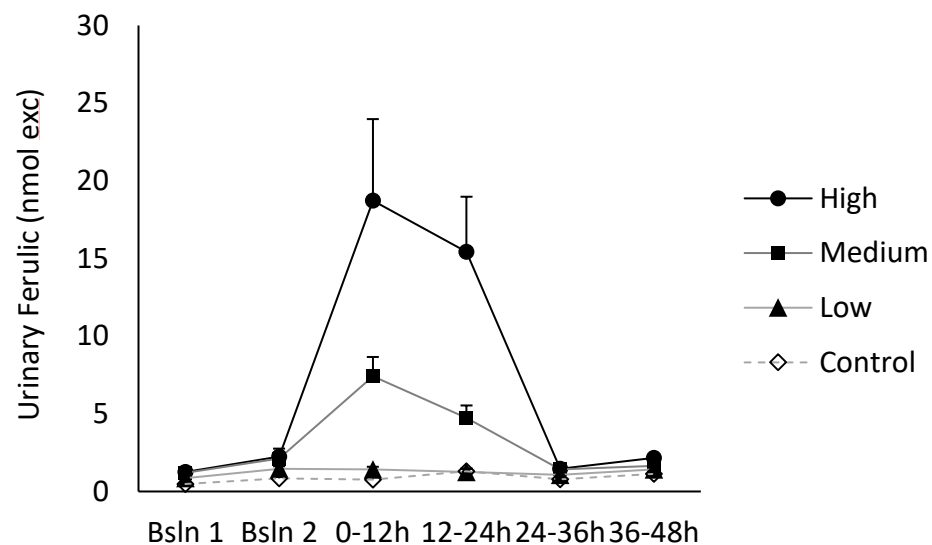

|         | Bsln 1                    | Bsln 2                     | 0-12h                       | 12-24h                      | 24-36h                    | 36-48h                   |
|---------|---------------------------|----------------------------|-----------------------------|-----------------------------|---------------------------|--------------------------|
| Control | 0.48 ± 0.18 <sup>bB</sup> | 0.85 ± 0.27 <sup>bAB</sup> | 0.77 ± 0.43 <sup>dAB</sup>  | 1.3 ± 0.42 <sup>cA</sup>    | 0.79 ± 0.14 <sup>AB</sup> | 1.14 ± 0.39 <sup>A</sup> |
| Low     | 0.86 ± 0.42 <sup>a</sup>  | 1.46 ± 0.46 <sup>a</sup>   | 1.43 ± 0.43 <sup>c</sup>    | 1.25 ± 0.65 <sup>c</sup>    | 1.07 ± 0.59               | 1.42 ± 0.74              |
| Medium  | 1.2 ± 0.42 <sup>aB</sup>  | 2.13 ± 1.07 <sup>aB</sup>  | 7.41 ± 3.52 <sup>aA</sup>   | 4.75 ± 2.24 <sup>bA</sup>   | 1.41 ± 0.33 <sup>B</sup>  | 1.64 ± 0.56 <sup>B</sup> |
| High    | 1.26 ± 0.47 <sup>aB</sup> | 2.24 ± 1.46 <sup>aB</sup>  | 18.72 ± 14.86 <sup>aA</sup> | 15.43 ± 10.03 <sup>aA</sup> | 1.47 ± 0.62 <sup>B</sup>  | 2.16 ± 0.6 <sup>B</sup>  |



Figure SI-13 – Urinary excretion of ferulic acid glucuronide.

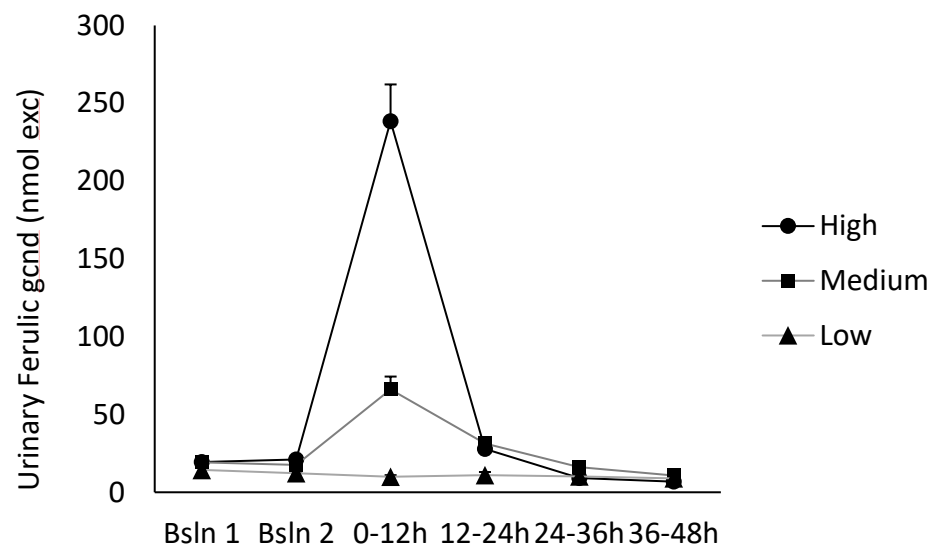

|         | Bsln 1                  | Bsln 2                  | 0-12h                      | 12-24h                    | 24-36h                    | 36-48h                  |
|---------|-------------------------|-------------------------|----------------------------|---------------------------|---------------------------|-------------------------|
| Control | nd                      | nd                      | nd                         | nd                        | nd                        | nd                      |
| Low     | 14.4 ± 5.7              | 12.3 ± 2.5              | 9.9 ± 2.9 <sup>c</sup>     | 11.1 ± 5.5 <sup>b</sup>   | 10.2 ± 3.3 <sup>ab</sup>  | 8.9 ± 2.7 <sup>a</sup>  |
| Medium  | 19.2 ± 4.2 <sup>C</sup> | 17.6 ± 4.4 <sup>C</sup> | 66.1 ± 23.4 <sup>bA</sup>  | 31.3 ± 10.5 <sup>aB</sup> | 16.2 ± 6.5 <sup>aCD</sup> | 10.8 ± 3 <sup>aD</sup>  |
| High    | 19.5 ± 2.4 <sup>B</sup> | 21.2 ± 6.2 <sup>B</sup> | 238.4 ± 66.9 <sup>aA</sup> | 27.8 ± 6.6 <sup>aB</sup>  | 9.2 ± 4 <sup>bc</sup>     | 6.8 ± 4.1 <sup>bc</sup> |

Figure SI-14 – Urinary excretion of ferulic acid sulfate.

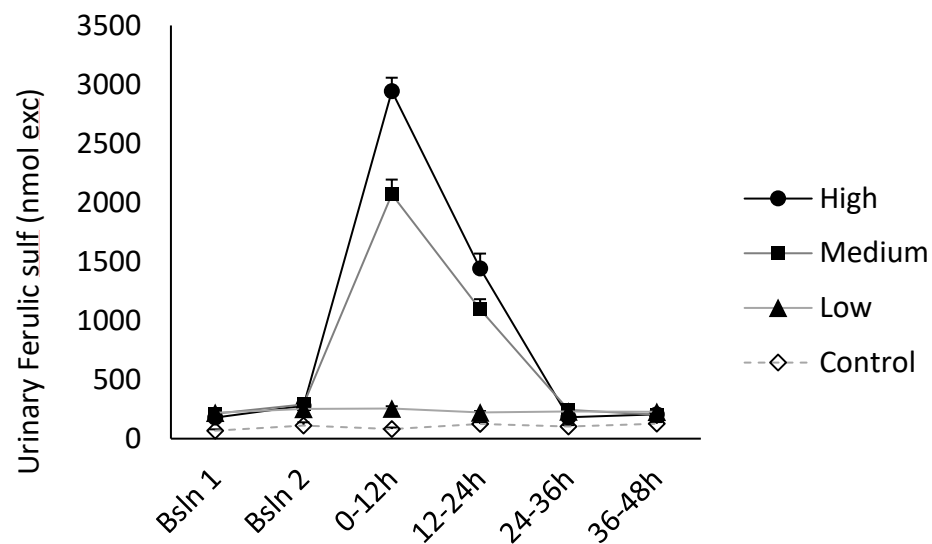

|         | Bsln 1                     | Bsln 2                      | 0-12h                        | 12-24h                       | 24-36h                      | 36-48h                     |
|---------|----------------------------|-----------------------------|------------------------------|------------------------------|-----------------------------|----------------------------|
| Control | 67.6 ± 31.7 <sup>bB</sup>  | 110.8 ± 78.2 <sup>bAB</sup> | 80.9 ± 37.8 <sup>cB</sup>    | 125 ± 41.1 <sup>cA</sup>     | 102.5 ± 33.7 <sup>bAB</sup> | 126.4 ± 39 <sup>bA</sup>   |
| Low     | 219.1 ± 31.5 <sup>a</sup>  | 250.8 ± 52.9 <sup>a</sup>   | 255.2 ± 50.7 <sup>b</sup>    | 221.3 ± 34.2 <sup>b</sup>    | 230.9 ± 53.3 <sup>a</sup>   | 228.3 ± 49 <sup>a</sup>    |
| Medium  | 209.8 ± 59.3 <sup>aC</sup> | 289.7 ± 105.6 <sup>aC</sup> | 2069.4 ± 353.8 <sup>aA</sup> | 1095.8 ± 242.1 <sup>aB</sup> | 243.4 ± 55.7 <sup>aC</sup>  | 202.3 ± 30.7 <sup>aC</sup> |
| High    | 177.9 ± 23.6 <sup>aC</sup> | 278.7 ± 82.7 <sup>aC</sup>  | 2943.2 ± 301.9 <sup>aA</sup> | 1440.6 ± 359.1 <sup>aB</sup> | 182.3 ± 60.4 <sup>aC</sup>  | 205.7 ± 41.3 <sup>aC</sup> |

Figure SI-15 – Urinary excretion of quercetin.

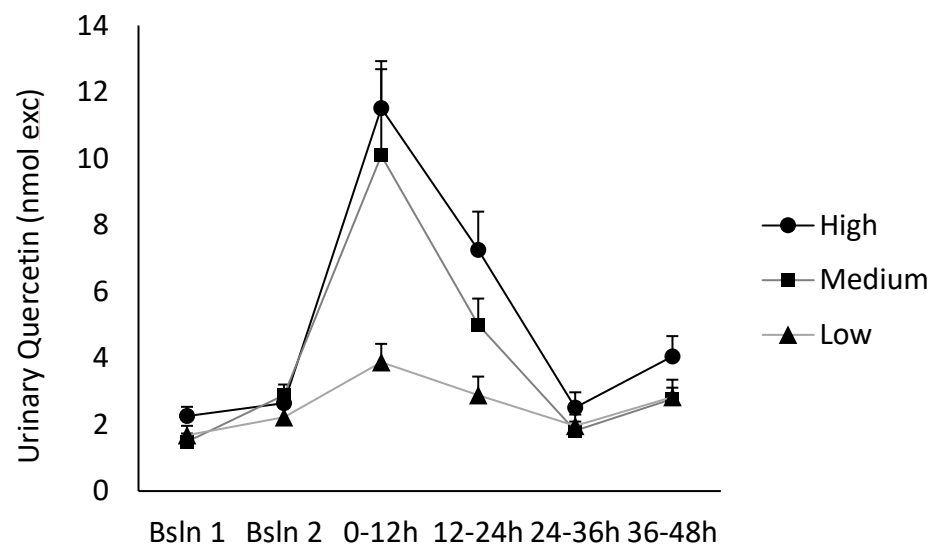

|         | Bsln 1                   | Bsln 2                   | 0-12h                      | 12-24h                     | 24-36h                   | 36-48h                    |
|---------|--------------------------|--------------------------|----------------------------|----------------------------|--------------------------|---------------------------|
| Control | nd                       | nd                       | nd                         | nd                         | nd                       | nd                        |
| Low     | 1.68 ± 0.8 <sup>B</sup>  | 2.22 ± 0.74 <sup>B</sup> | 3.88 ± 1.46 <sup>bA</sup>  | 2.88 ± 1.59 <sup>bAB</sup> | 1.96 ± 0.97 <sup>B</sup> | 2.83 ± 1.47 <sup>AB</sup> |
| Medium  | 1.48 ± 0.7 <sup>C</sup>  | 2.89 ± 0.84 <sup>C</sup> | 10.09 ± 7.35 <sup>aA</sup> | 5 ± 2.22 <sup>abAB</sup>   | 1.82 ± 0.77 <sup>C</sup> | 2.77 ± 0.97 <sup>BC</sup> |
| High    | 2.25 ± 0.79 <sup>C</sup> | 2.64 ± 1.01 <sup>C</sup> | 11.52 ± 3.99 <sup>aA</sup> | 7.25 ± 3.26 <sup>aAB</sup> | 2.5 ± 1.32 <sup>C</sup>  | 4.05 ± 1.61 <sup>BC</sup> |

Figure SI-16 – Urinary excretion of quercetin glucuronide.

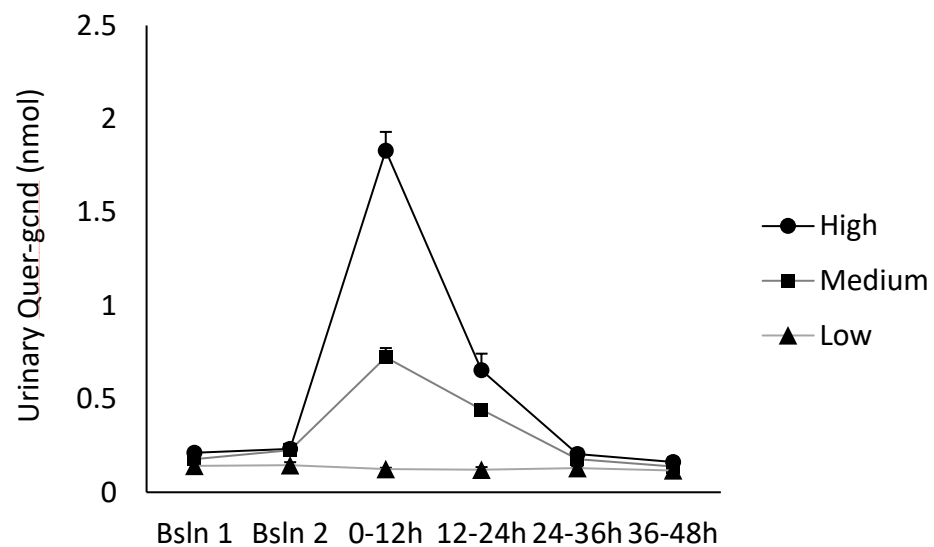

|         | Bsln 1                     | Bsln 2                    | 0-12h                     | 12-24h                    | 24-36h                     | 36-48h                   |
|---------|----------------------------|---------------------------|---------------------------|---------------------------|----------------------------|--------------------------|
| Control | nd                         | nd                        | nd                        | nd                        | nd                         | nd                       |
| Low     | 0.14 ± 0.02 <sup>b</sup>   | 0.15 ± 0.05 <sup>b</sup>  | 0.12 ± 0.02 <sup>c</sup>  | 0.12 ± 0.04 <sup>c</sup>  | 0.13 ± 0.02 <sup>b</sup>   | 0.12 ± 0.03              |
| Medium  | 0.18 ± 0.03 <sup>aCD</sup> | 0.23 ± 0.1 <sup>aC</sup>  | 0.72 ± 0.14 <sup>bA</sup> | 0.44 ± 0.06 <sup>bB</sup> | 0.18 ± 0.04 <sup>aCD</sup> | 0.14 ± 0.03 <sup>D</sup> |
| High    | 0.21 ± 0.06 <sup>aCD</sup> | 0.23 ± 0.06 <sup>aC</sup> | 1.83 ± 0.28 <sup>aA</sup> | 0.65 ± 0.25 <sup>aB</sup> | 0.21 ± 0.08 <sup>aCD</sup> | 0.16 ± 0.07 <sup>D</sup> |

Figure SI-17 – Urinary excretion of 4-methoxy quercetin.

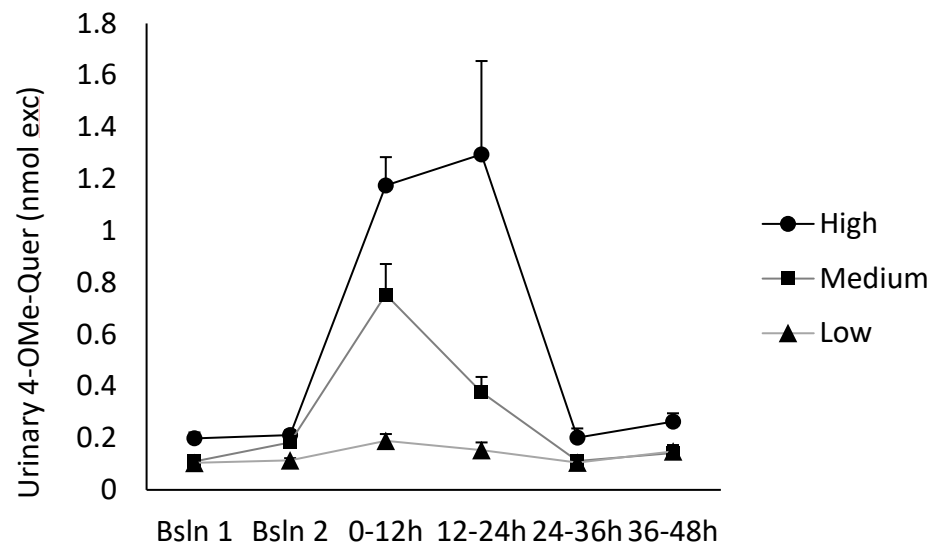

|         | Bsln 1                    | Bsln 2                    | 0-12h                     | 12-24h                     | 24-36h                     | 36-48h                     |
|---------|---------------------------|---------------------------|---------------------------|----------------------------|----------------------------|----------------------------|
| Control | nd                        | nd                        | nd                        | nd                         | nd                         | nd                         |
| Low     | 0.1 ± 0.05 <sup>bB</sup>  | 0.11 ± 0.02 <sup>bB</sup> | 0.19 ± 0.08 <sup>bA</sup> | 0.15 ± 0.08 <sup>cAB</sup> | 0.11 ± 0.05 <sup>bB</sup>  | 0.15 ± 0.07 <sup>bAB</sup> |
| Medium  | 0.11 ± 0.04 <sup>bC</sup> | 0.18 ± 0.04 <sup>aC</sup> | 0.75 ± 0.33 <sup>aA</sup> | 0.38 ± 0.17 <sup>bB</sup>  | 0.11 ± 0.04 <sup>abC</sup> | 0.14 ± 0.05 <sup>bC</sup>  |
| High    | 0.2 ± 0.06 <sup>aB</sup>  | 0.21 ± 0.06 <sup>aB</sup> | 1.17 ± 0.31 <sup>aA</sup> | 1.29 ± 1.02 <sup>aA</sup>  | 0.2 ± 0.11 <sup>aB</sup>   | 0.26 ± 0.1 <sup>aB</sup>   |

Figure SI-18 – Urinary excretion of methyl quercetin glucuronide.

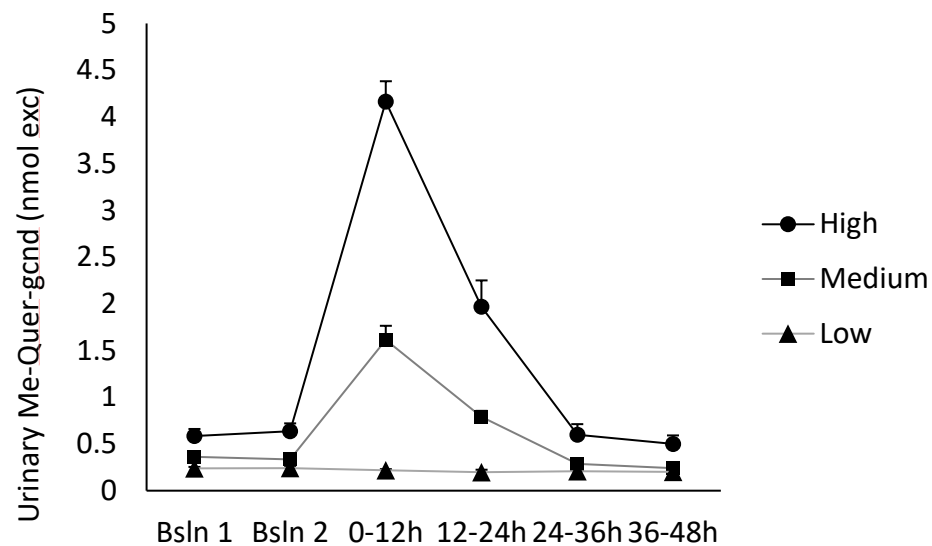

|         | Bsln 1                    | Bsln 2                    | 0-12h                     | 12-24h                    | 24-36h                    | 36-48h                    |
|---------|---------------------------|---------------------------|---------------------------|---------------------------|---------------------------|---------------------------|
| Control | nd                        | nd                        | nd                        | nd                        | nd                        | nd                        |
| Low     | 0.24 ± 0.04 <sup>b</sup>  | 0.24 ± 0.07 <sup>b</sup>  | 0.22 ± 0.04 <sup>c</sup>  | 0.2 ± 0.08 <sup>c</sup>   | 0.21 ± 0.05 <sup>b</sup>  | 0.2 ± 0.09 <sup>b</sup>   |
| Medium  | 0.36 ± 0.16 <sup>bc</sup> | 0.34 ± 0.1 <sup>bc</sup>  | 1.61 ± 0.43 <sup>ba</sup> | 0.79 ± 0.18 <sup>bb</sup> | 0.29 ± 0.09 <sup>bc</sup> | 0.24 ± 0.09 <sup>bc</sup> |
| High    | 0.59 ± 0.21 <sup>ac</sup> | 0.64 ± 0.24 <sup>ac</sup> | 4.16 ± 0.58 <sup>aA</sup> | 1.97 ± 0.75 <sup>ab</sup> | 0.6 ± 0.3 <sup>ac</sup>   | 0.5 ± 0.24 <sup>ac</sup>  |

Figure SI-19 – Urinary excretion of cyanidin-3-galactoside.

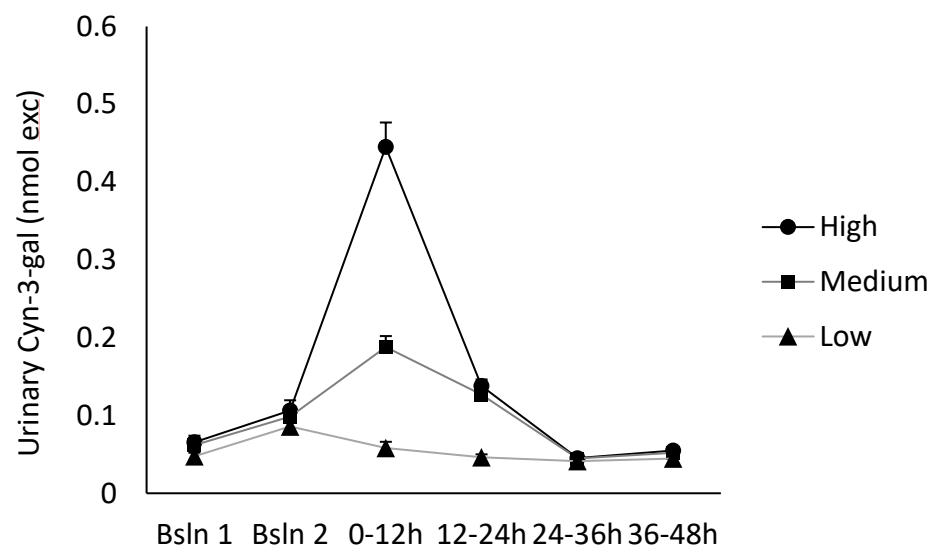

|         | Bsln 1                       | Bsln 2                       | 0-12h                          | 12-24h                         | 24-36h                       | 36-48h                       |
|---------|------------------------------|------------------------------|--------------------------------|--------------------------------|------------------------------|------------------------------|
| Control | nd                           | nd                           | nd                             | nd                             | nd                           | nd                           |
| Low     | 0.0473 ± 0.0133 <sup>A</sup> | 0.0858 ± 0.022 <sup>A</sup>  | 0.0583 ± 0.0206 <sup>cAB</sup> | 0.0463 ± 0.0108 <sup>bAB</sup> | 0.0413 ± 0.0134 <sup>B</sup> | 0.0446 ± 0.0159 <sup>B</sup> |
| Medium  | 0.062 ± 0.034 <sup>C</sup>   | 0.0984 ± 0.0373 <sup>C</sup> | 0.1879 ± 0.0399 <sup>bA</sup>  | 0.1267 ± 0.0489 <sup>aB</sup>  | 0.0448 ± 0.0145 <sup>D</sup> | 0.0521 ± 0.0175 <sup>D</sup> |
| High    | 0.0656 ± 0.0163 <sup>C</sup> | 0.1065 ± 0.0369 <sup>C</sup> | 0.445 ± 0.0891 <sup>aA</sup>   | 0.138 ± 0.0234 <sup>aB</sup>   | 0.0452 ± 0.0085 <sup>D</sup> | 0.0548 ± 0.0057 <sup>D</sup> |

Figure SI-20 – Urinary excretion of cyanidin-3-glucoside.

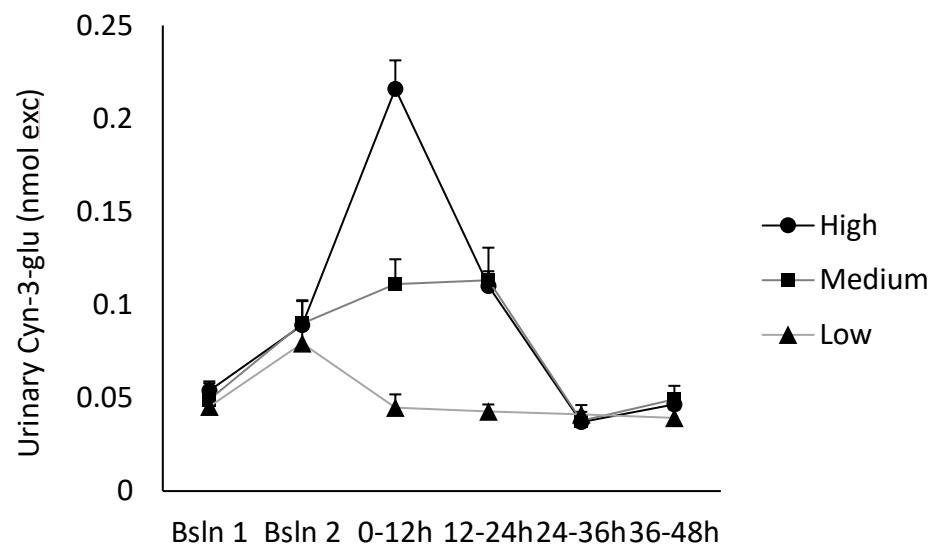

|         | Bsln 1                        | Bsln 2                       | 0-12h                         | 12-24h                        | 24-36h                       | 36-48h                        |
|---------|-------------------------------|------------------------------|-------------------------------|-------------------------------|------------------------------|-------------------------------|
| Control | nd                            | nd                           | nd                            | nd                            | nd                           | nd                            |
| Low     | 0.0453 ± 0.0151 <sup>B</sup>  | 0.0794 ± 0.0239 <sup>A</sup> | 0.0448 ± 0.0188 <sup>cB</sup> | 0.0427 ± 0.0107 <sup>bB</sup> | 0.0411 ± 0.0143 <sup>B</sup> | 0.0393 ± 0.013 <sup>B</sup>   |
| Medium  | 0.0492 ± 0.0247 <sup>BC</sup> | 0.0901 ± 0.0337 <sup>B</sup> | 0.1111 ± 0.0379 <sup>bA</sup> | 0.1132 ± 0.0495 <sup>aA</sup> | 0.0378 ± 0.0136 <sup>D</sup> | 0.0493 ± 0.0205 <sup>CD</sup> |
| High    | 0.0539 ± 0.0142 <sup>CD</sup> | 0.0892 ± 0.0375 <sup>C</sup> | 0.216 ± 0.0433 <sup>aA</sup>  | 0.11 ± 0.0226 <sup>aB</sup>   | 0.037 ± 0.0078 <sup>E</sup>  | 0.0466 ± 0.0089 <sup>DE</sup> |



Figure SI-21 – Urinary excretion of cyanidin glucuronide.

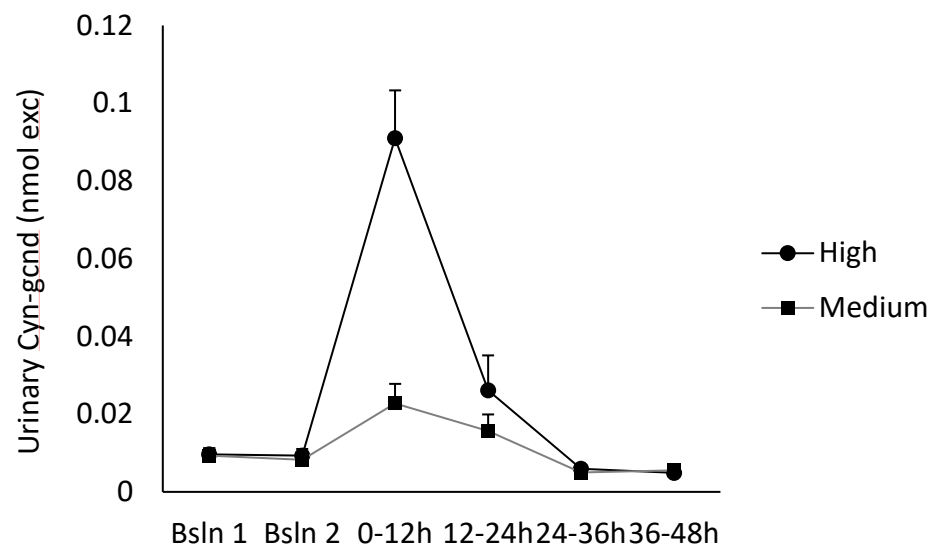

|         | Bsln 1                        | Bsln 2                        | 0-12h                        | 12-24h                       | 24-36h                      | 36-48h                       |
|---------|-------------------------------|-------------------------------|------------------------------|------------------------------|-----------------------------|------------------------------|
| Control | nd                            | nd                            | nd                           | nd                           | nd                          | nd                           |
| Low     | nd                            | nd                            | nd                           | nd                           | nd                          | nd                           |
| Medium  | 0.0093 ± 0.0045 <sup>BC</sup> | 0.0083 ± 0.0027 <sup>BC</sup> | 0.0228 ± 0.0142 <sup>b</sup> | 0.0157 ± 0.012 <sup>B</sup>  | 0.005 ± 0.0016 <sup>C</sup> | 0.0055 ± 0.0003 <sup>C</sup> |
| High    | 0.0097 ± 0.0045 <sup>BC</sup> | 0.0093 ± 0.0049 <sup>BC</sup> | 0.091 ± 0.0348 <sup>a</sup>  | 0.0262 ± 0.0253 <sup>B</sup> | 0.006 ± 0.0019 <sup>C</sup> | 0.0049 ± 0.0014 <sup>C</sup> |

Figure SI-22 – Urinary excretion of delphinidin-3-galactoside.

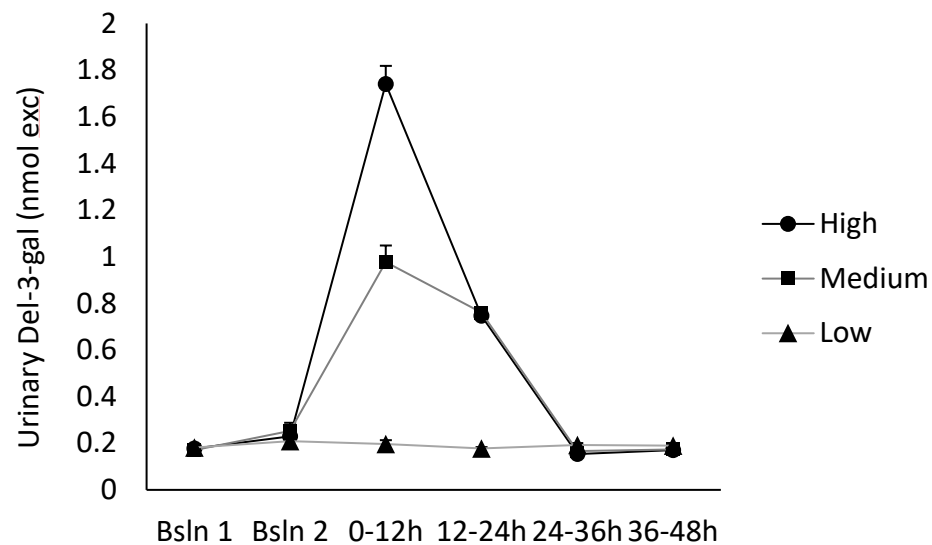

|         | Bsln 1                       | Bsln 2                       | 0-12h                         | 12-24h                        | 24-36h                       | 36-48h                       |
|---------|------------------------------|------------------------------|-------------------------------|-------------------------------|------------------------------|------------------------------|
| Control | nd                           | nd                           | nd                            | nd                            | nd                           | nd                           |
| Low     | 0.1821 ± 0.0096              | 0.2089 ± 0.0251              | 0.1968 ± 0.043 <sup>C</sup>   | 0.1777 ± 0.0163 <sup>b</sup>  | 0.1924 ± 0.0222              | 0.1904 ± 0.0226              |
| Medium  | 0.1705 ± 0.0297 <sup>B</sup> | 0.2522 ± 0.1005 <sup>B</sup> | 0.9769 ± 0.2007 <sup>bA</sup> | 0.7607 ± 0.0642 <sup>aA</sup> | 0.1664 ± 0.0359 <sup>B</sup> | 0.173 ± 0.0269 <sup>B</sup>  |
| High    | 0.178 ± 0.0256 <sup>C</sup>  | 0.2291 ± 0.0856 <sup>C</sup> | 1.7408 ± 0.2185 <sup>aA</sup> | 0.7474 ± 0.0909 <sup>aB</sup> | 0.1536 ± 0.0192 <sup>C</sup> | 0.1701 ± 0.0184 <sup>C</sup> |

Figure SI-23 – Urinary excretion of delphinidin-3-glucoside.

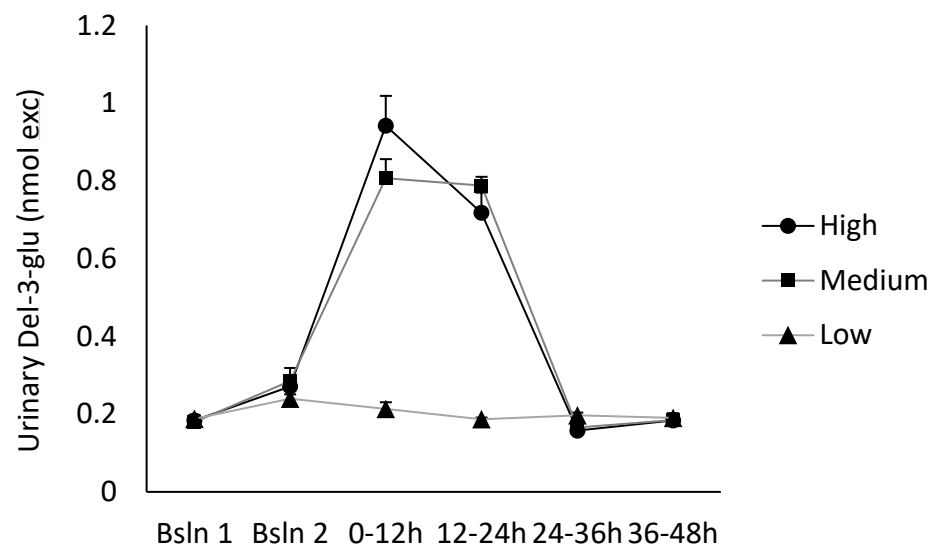

|         | Bsln 1                       | Bsln 2                      | 0-12h                        | 12-24h                        | 24-36h                        | 36-48h                        |
|---------|------------------------------|-----------------------------|------------------------------|-------------------------------|-------------------------------|-------------------------------|
| Control | nd                           | nd                          | nd                           | nd                            | nd                            | nd                            |
| Low     | 0.1883 ± 0.0202              | 0.2397 ± 0.0316             | 0.2137 ± 0.0445 <sup>b</sup> | 0.1867 ± 0.0124 <sup>b</sup>  | 0.197 ± 0.0199 <sup>a</sup>   | 0.1906 ± 0.0185               |
| Medium  | 0.1795 ± 0.049 <sup>BC</sup> | 0.2849 ± 0.096 <sup>B</sup> | 0.807 ± 0.1387 <sup>aA</sup> | 0.7878 ± 0.0644 <sup>aA</sup> | 0.1656 ± 0.0317 <sup>bC</sup> | 0.1844 ± 0.0514 <sup>BC</sup> |
| High    | 0.184 ± 0.0255 <sup>CD</sup> | 0.271 ± 0.0838 <sup>C</sup> | 0.9421 ± 0.217 <sup>aA</sup> | 0.7179 ± 0.1472 <sup>aB</sup> | 0.1578 ± 0.0188 <sup>bD</sup> | 0.1839 ± 0.0166 <sup>CD</sup> |

Figure SI-24 – Urinary excretion of delphinidin glucuronide.

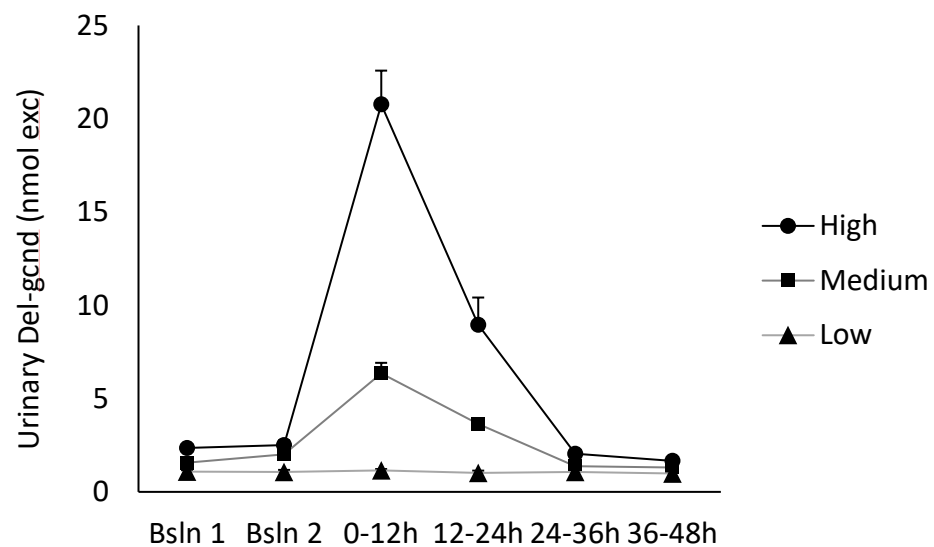

|         | Bsln 1                    | Bsln 2                    | 0-12h                      | 12-24h                    | 24-36h                     | 36-48h                     |
|---------|---------------------------|---------------------------|----------------------------|---------------------------|----------------------------|----------------------------|
| Control | nd                        | nd                        | nd                         | nd                        | nd                         | nd                         |
| Low     | 1.08 ± 0.22 <sup>b</sup>  | 1.07 ± 0.31 <sup>b</sup>  | 1.15 ± 0.19 <sup>c</sup>   | 1.01 ± 0.37 <sup>c</sup>  | 1.06 ± 0.29 <sup>b</sup>   | 0.99 ± 0.43 <sup>b</sup>   |
| Medium  | 1.57 ± 0.39 <sup>bc</sup> | 2.01 ± 0.80 <sup>ac</sup> | 6.35 ± 1.60 <sup>ba</sup>  | 3.63 ± 0.59 <sup>bb</sup> | 1.37 ± 0.41 <sup>bc</sup>  | 1.31 ± 0.39 <sup>abc</sup> |
| High    | 2.36 ± 0.56 <sup>ac</sup> | 2.50 ± 0.75 <sup>ac</sup> | 20.77 ± 5.12 <sup>aA</sup> | 8.96 ± 4.11 <sup>aB</sup> | 2.05 ± 0.54 <sup>aCD</sup> | 1.66 ± 0.55 <sup>aD</sup>  |

Figure SI-25 – Urinary excretion of delphinidin sulfate.

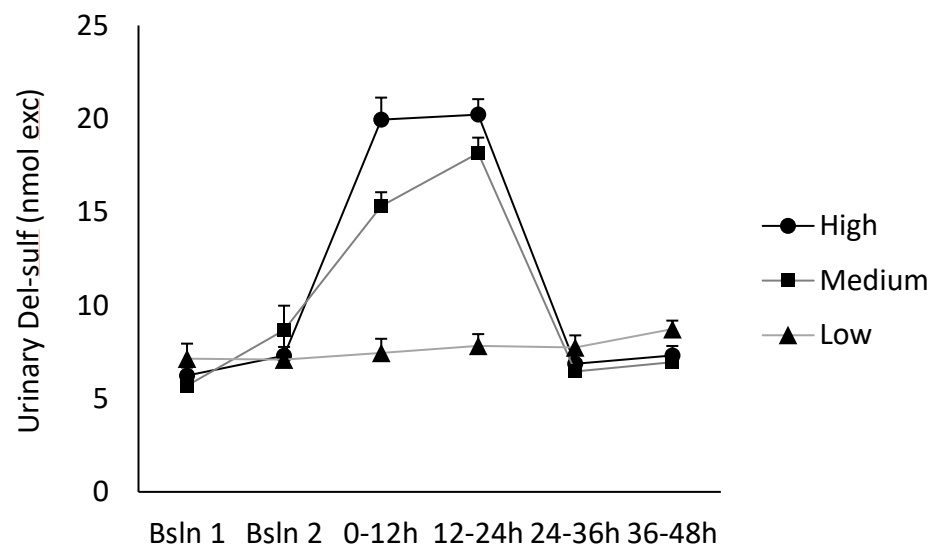

|         | Bsln 1                   | Bsln 2                   | 0-12h                      | 12-24h                     | 24-36h                   | 36-48h                   |
|---------|--------------------------|--------------------------|----------------------------|----------------------------|--------------------------|--------------------------|
| Control | nd                       | nd                       | nd                         | nd                         | nd                       | nd                       |
| Low     | 7.14 ± 2.28              | 7.09 ± 1.92              | 7.45 ± 1.99 <sup>c</sup>   | 7.83 ± 1.78 <sup>b</sup>   | 7.75 ± 1.81              | 8.72 ± 1.29              |
| Medium  | 5.69 ± 0.89 <sup>B</sup> | 8.67 ± 3.69 <sup>B</sup> | 15.32 ± 2.11 <sup>bA</sup> | 18.16 ± 2.35 <sup>aA</sup> | 6.45 ± 1.2 <sup>B</sup>  | 6.95 ± 1.65 <sup>B</sup> |
| High    | 6.24 ± 1.22 <sup>B</sup> | 7.29 ± 3.03 <sup>B</sup> | 19.95 ± 3.35 <sup>aA</sup> | 20.22 ± 2.35 <sup>aA</sup> | 6.87 ± 1.34 <sup>B</sup> | 7.31 ± 1.35 <sup>B</sup> |

Figure SI-26 – Urinary excretion of malvidin-3-galactoside.

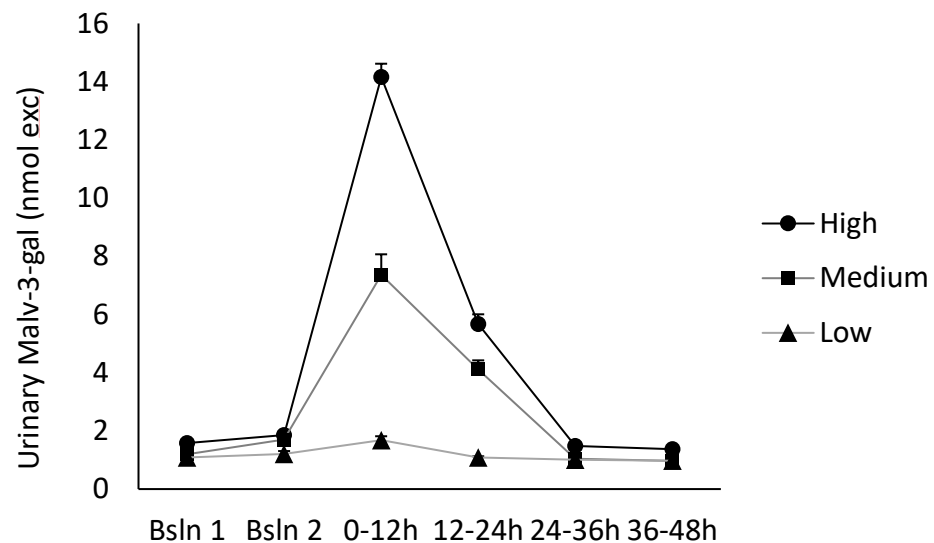

|         | Bsln 1                    | Bsln 2                    | 0-12h                      | 12-24h                    | 24-36h                    | 36-48h                    |
|---------|---------------------------|---------------------------|----------------------------|---------------------------|---------------------------|---------------------------|
| Control | nd                        | nd                        | nd                         | nd                        | nd                        | nd                        |
| Low     | 1.09 ± 0.12 <sup>bB</sup> | 1.21 ± 0.26 <sup>bB</sup> | 1.68 ± 0.33 <sup>cA</sup>  | 1.09 ± 0.11 <sup>cB</sup> | 1.01 ± 0.13 <sup>bB</sup> | 0.97 ± 0.19 <sup>bB</sup> |
| Medium  | 1.19 ± 0.27 <sup>bC</sup> | 1.70 ± 0.50 <sup>aC</sup> | 7.36 ± 2.00 <sup>bA</sup>  | 4.11 ± 0.82 <sup>bB</sup> | 1.04 ± 0.31 <sup>bC</sup> | 0.97 ± 0.17 <sup>bC</sup> |
| High    | 1.58 ± 0.20 <sup>aC</sup> | 1.86 ± 0.39 <sup>aC</sup> | 14.16 ± 1.30 <sup>aA</sup> | 5.67 ± 0.96 <sup>aB</sup> | 1.48 ± 0.18 <sup>aC</sup> | 1.37 ± 0.15 <sup>aC</sup> |

Figure SI-27 – Urinary excretion of malvidin-3-glucoside.

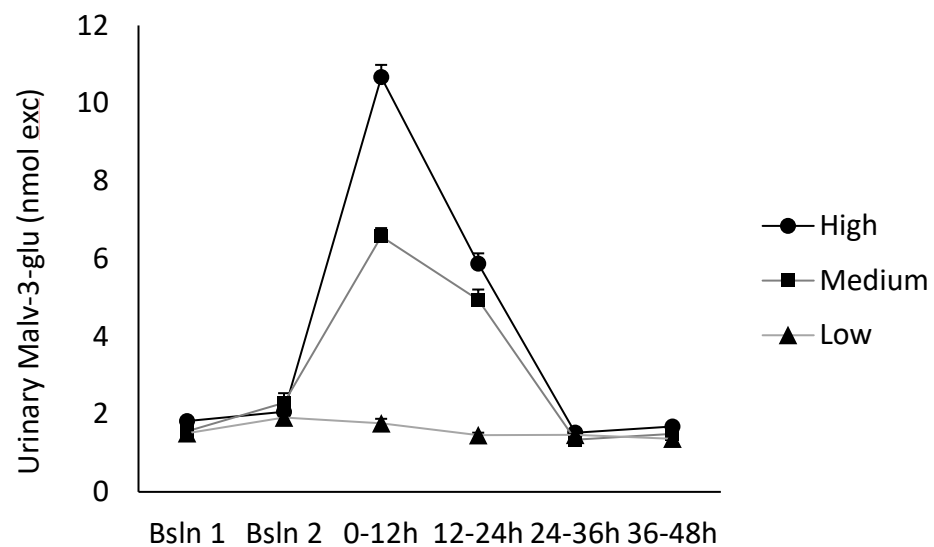

|         | Bsln 1                    | Bsln 2                   | 0-12h                     | 12-24h                    | 24-36h                   | 36-48h                   |
|---------|---------------------------|--------------------------|---------------------------|---------------------------|--------------------------|--------------------------|
| Control | nd                        | nd                       | nd                        | nd                        | nd                       | nd                       |
| Low     | 1.51 ± 0.14               | 1.91 ± 0.25              | 1.76 ± 0.31 <sup>C</sup>  | 1.46 ± 0.17 <sup>b</sup>  | 1.47 ± 0.25              | 1.37 ± 0.25              |
| Medium  | 1.56 ± 0.34 <sup>CD</sup> | 2.29 ± 0.7 <sup>C</sup>  | 6.57 ± 0.57 <sup>bA</sup> | 4.94 ± 0.75 <sup>aB</sup> | 1.34 ± 0.27 <sup>D</sup> | 1.49 ± 0.3 <sup>D</sup>  |
| High    | 1.82 ± 0.21 <sup>C</sup>  | 2.06 ± 0.12 <sup>C</sup> | 10.67 ± 0.9 <sup>aA</sup> | 5.87 ± 0.76 <sup>aB</sup> | 1.52 ± 0.2 <sup>C</sup>  | 1.68 ± 0.11 <sup>C</sup> |

Figure SI-28 – Urinary excretion of peonidin-3-galactoside.

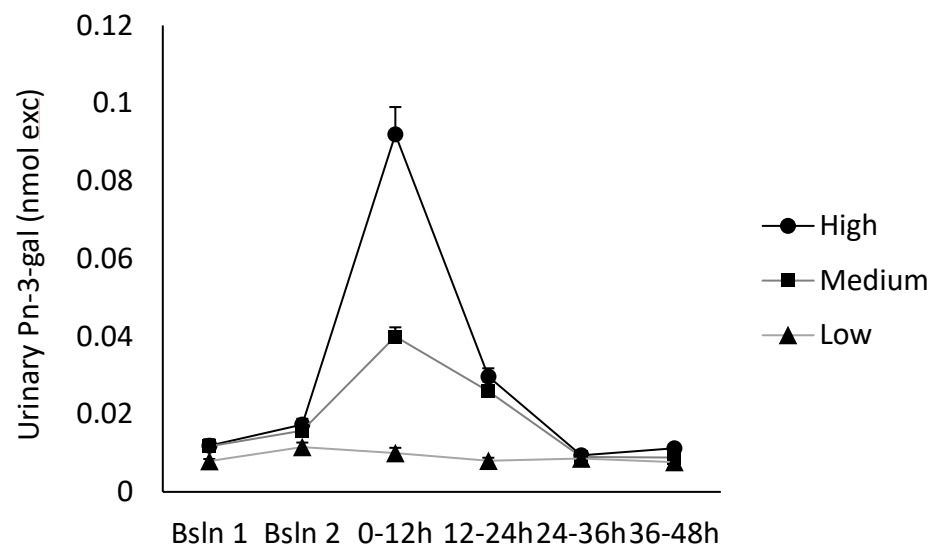

|         | Bsln 1                        | Bsln 2                        | 0-12h                        | 12-24h                        | 24-36h                       | 36-48h                       |
|---------|-------------------------------|-------------------------------|------------------------------|-------------------------------|------------------------------|------------------------------|
| Control | nd                            | nd                            | nd                           | nd                            | nd                           | nd                           |
| Low     | 0.0079 ± 0.0014 <sup>b</sup>  | 0.0115 ± 0.0033 <sup>b</sup>  | 0.01 ± 0.0036 <sup>c</sup>   | 0.008 ± 0.0022 <sup>b</sup>   | 0.0086 ± 0.0028              | 0.0076 ± 0.0026              |
| Medium  | 0.0117 ± 0.0053 <sup>aC</sup> | 0.0158 ± 0.0045 <sup>aC</sup> | 0.04 ± 0.0067 <sup>bA</sup>  | 0.0259 ± 0.0071 <sup>aB</sup> | 0.009 ± 0.0036 <sup>D</sup>  | 0.0088 ± 0.0031 <sup>D</sup> |
| High    | 0.0119 ± 0.0021 <sup>aC</sup> | 0.0173 ± 0.0042 <sup>aC</sup> | 0.092 ± 0.0199 <sup>aA</sup> | 0.0297 ± 0.0061 <sup>aB</sup> | 0.0094 ± 0.0028 <sup>C</sup> | 0.0113 ± 0.0013 <sup>C</sup> |



Figure SI-29 – Urinary excretion of peonidin-3-glucoside.

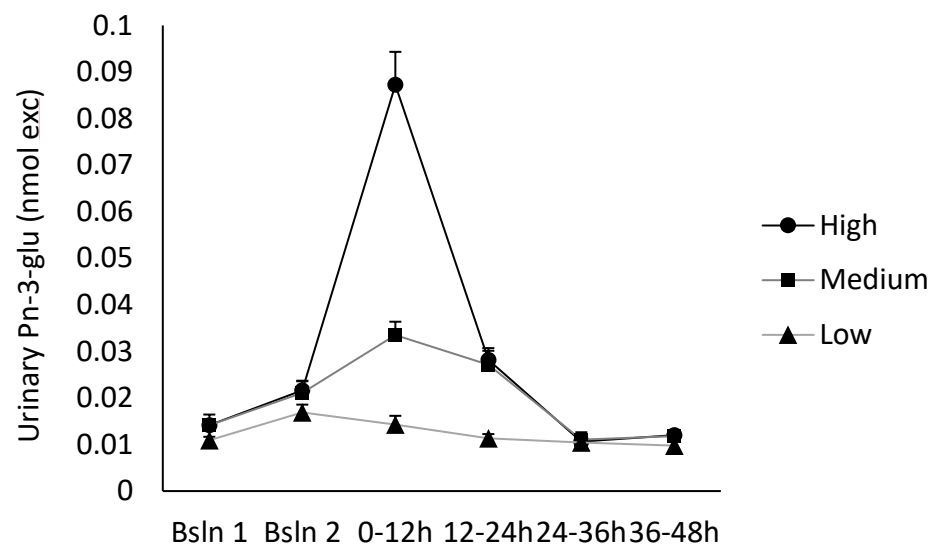

|         | Bsln 1                        | Bsln 2                       | 0-12h                         | 12-24h                         | 24-36h                       | 36-48h                       |
|---------|-------------------------------|------------------------------|-------------------------------|--------------------------------|------------------------------|------------------------------|
| Control | nd                            | nd                           | nd                            | nd                             | nd                           | nd                           |
| Low     | 0.0109 ± 0.0022               | 0.0169 ± 0.0047              | 0.0143 ± 0.005 <sup>C</sup>   | 0.0114 ± 0.0025 <sup>b</sup>   | 0.0105 ± 0.0035              | 0.0098 ± 0.0024              |
| Medium  | 0.0142 ± 0.0064 <sup>BC</sup> | 0.0211 ± 0.0074 <sup>B</sup> | 0.0335 ± 0.0081 <sup>bA</sup> | 0.0271 ± 0.0086 <sup>aAB</sup> | 0.011 ± 0.0045 <sup>C</sup>  | 0.0118 ± 0.0023 <sup>C</sup> |
| High    | 0.0142 ± 0.0035 <sup>CD</sup> | 0.0216 ± 0.0056 <sup>C</sup> | 0.0872 ± 0.0201 <sup>aA</sup> | 0.0282 ± 0.0071 <sup>aB</sup>  | 0.0106 ± 0.0023 <sup>D</sup> | 0.012 ± 0.0028 <sup>D</sup>  |

Figure SI-30 – Urinary excretion of peonidin glucuronide.

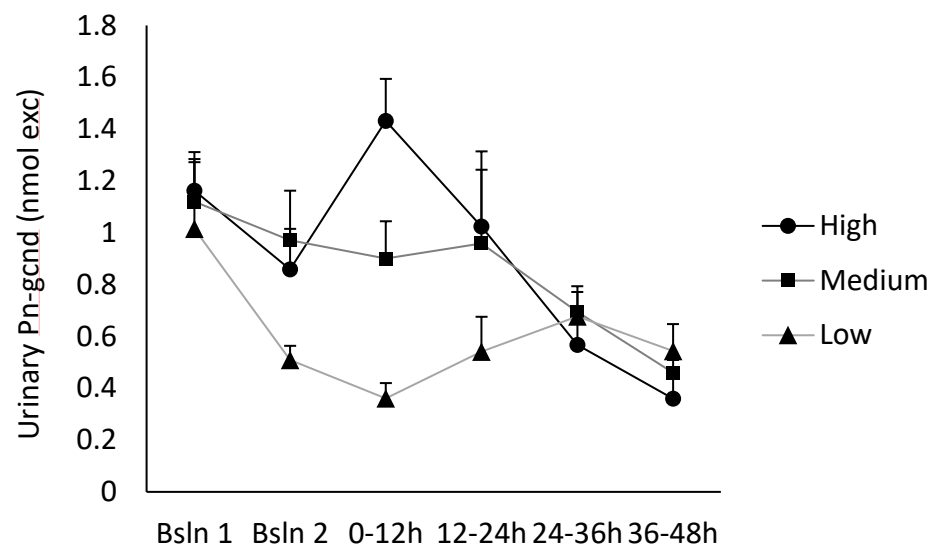

|         | Bsln 1                    | Bsln 2                   | 0-12h                     | 12-24h                      | 24-36h                    | 36-48h                   |
|---------|---------------------------|--------------------------|---------------------------|-----------------------------|---------------------------|--------------------------|
| Control | nd                        | nd                       | nd                        | nd                          | nd                        | nd                       |
| Low     | 1.01 ± 0.73 <sup>A</sup>  | 0.51 ± 0.14 <sup>B</sup> | 0.36 ± 0.16 <sup>bB</sup> | 0.54 ± 0.38 <sup>bB</sup>   | 0.68 ± 0.27 <sup>B</sup>  | 0.54 ± 0.29 <sup>B</sup> |
| Medium  | 1.12 ± 0.47 <sup>A</sup>  | 0.97 ± 0.54 <sup>A</sup> | 0.9 ± 0.41 <sup>aAB</sup> | 0.96 ± 0.81 <sup>abAB</sup> | 0.69 ± 0.28 <sup>AB</sup> | 0.46 ± 0.14 <sup>B</sup> |
| High    | 1.16 ± 0.42 <sup>AB</sup> | 0.86 ± 0.44 <sup>B</sup> | 1.43 ± 0.46 <sup>aA</sup> | 1.02 ± 0.82 <sup>aAB</sup>  | 0.57 ± 0.24 <sup>BC</sup> | 0.36 ± 0.2 <sup>C</sup>  |

Figure SI-31 – Urinary excretion of peonidin sulfate.

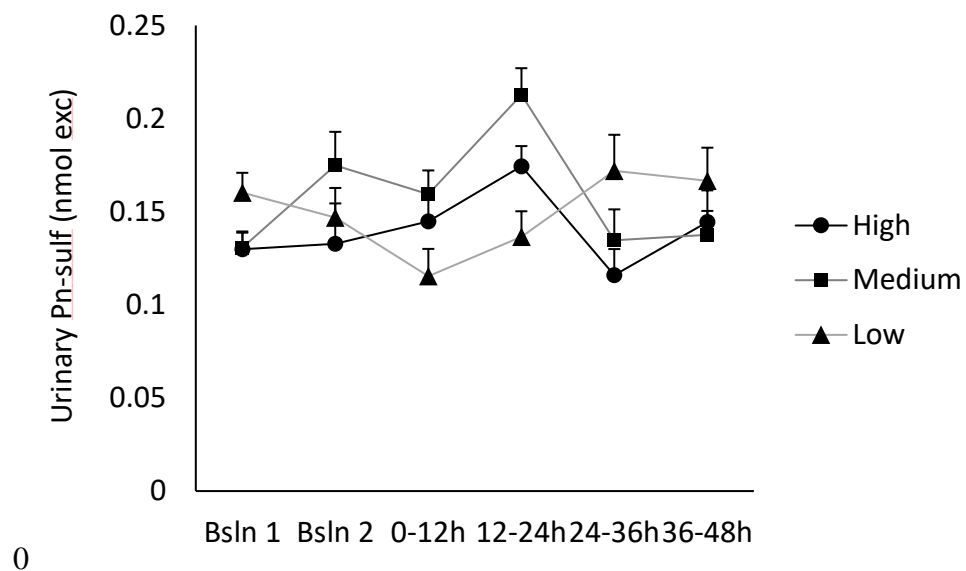

|         | Bsln 1                       | Bsln 2                        | 0-12h                         | 12-24h                        | 24-36h                       | 36-48h                        |
|---------|------------------------------|-------------------------------|-------------------------------|-------------------------------|------------------------------|-------------------------------|
| Control | nd                           | nd                            | nd                            | nd                            | nd                           | nd                            |
| Low     | 0.1603 ± 0.03 <sup>A</sup>   | 0.1468 ± 0.0452 <sup>AB</sup> | 0.1154 ± 0.0388 <sup>B</sup>  | 0.1365 ± 0.0388 <sup>AB</sup> | 0.1719 ± 0.0547 <sup>A</sup> | 0.1667 ± 0.0501 <sup>A</sup>  |
| Medium  | 0.1307 ± 0.0247              | 0.1748 ± 0.0511               | 0.1594 ± 0.0361               | 0.2128 ± 0.0404               | 0.1347 ± 0.0468              | 0.1376 ± 0.0362               |
| High    | 0.1299 ± 0.0251 <sup>B</sup> | 0.1328 ± 0.0611 <sup>B</sup>  | 0.1448 ± 0.0368 <sup>AB</sup> | 0.1744 ± 0.0306 <sup>A</sup>  | 0.1159 ± 0.0396 <sup>B</sup> | 0.1445 ± 0.0449 <sup>AB</sup> |

Figure SI-32 – Urinary excretion of petunidin-3-galactoside.

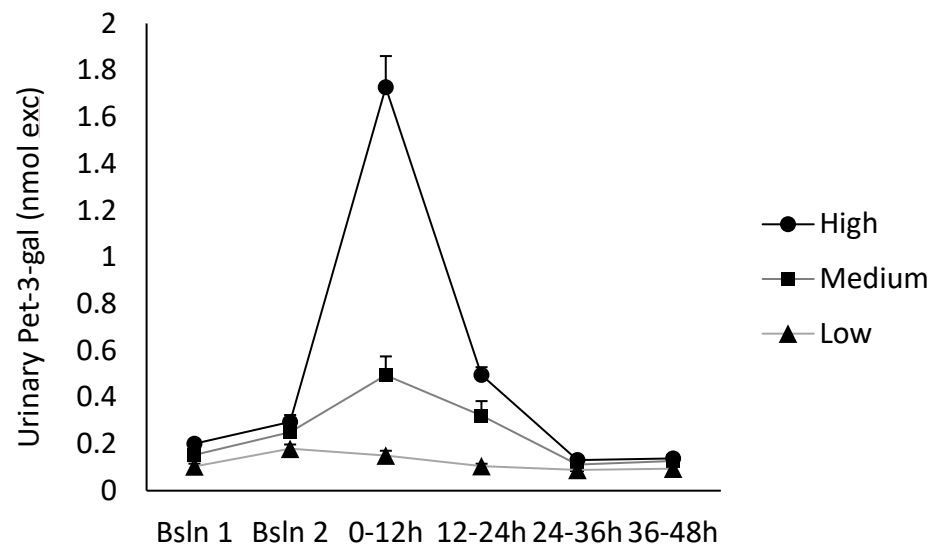

|         | Bsln 1                     | Bsln 2                    | 0-12h                     | 12-24h                     | 24-36h                     | 36-48h                    |
|---------|----------------------------|---------------------------|---------------------------|----------------------------|----------------------------|---------------------------|
| Control | nd                         | nd                        | nd                        | nd                         | nd                         | nd                        |
| Low     | 0.1 ± 0.03 <sup>bB</sup>   | 0.18 ± 0.05 <sup>bA</sup> | 0.15 ± 0.05 <sup>cA</sup> | 0.11 ± 0.03 <sup>cAB</sup> | 0.09 ± 0.03 <sup>bB</sup>  | 0.09 ± 0.03 <sup>AB</sup> |
| Medium  | 0.15 ± 0.09 <sup>abC</sup> | 0.25 ± 0.1 <sup>abC</sup> | 0.49 ± 0.23 <sup>bA</sup> | 0.32 ± 0.17 <sup>bB</sup>  | 0.11 ± 0.05 <sup>abD</sup> | 0.13 ± 0.04 <sup>D</sup>  |
| High    | 0.2 ± 0.04 <sup>aC</sup>   | 0.29 ± 0.09 <sup>aC</sup> | 1.73 ± 0.38 <sup>aA</sup> | 0.5 ± 0.09 <sup>aB</sup>   | 0.13 ± 0.02 <sup>aD</sup>  | 0.14 ± 0.02 <sup>D</sup>  |

Figure SI-33 – Urinary excretion of petunidin-3-glucoside.

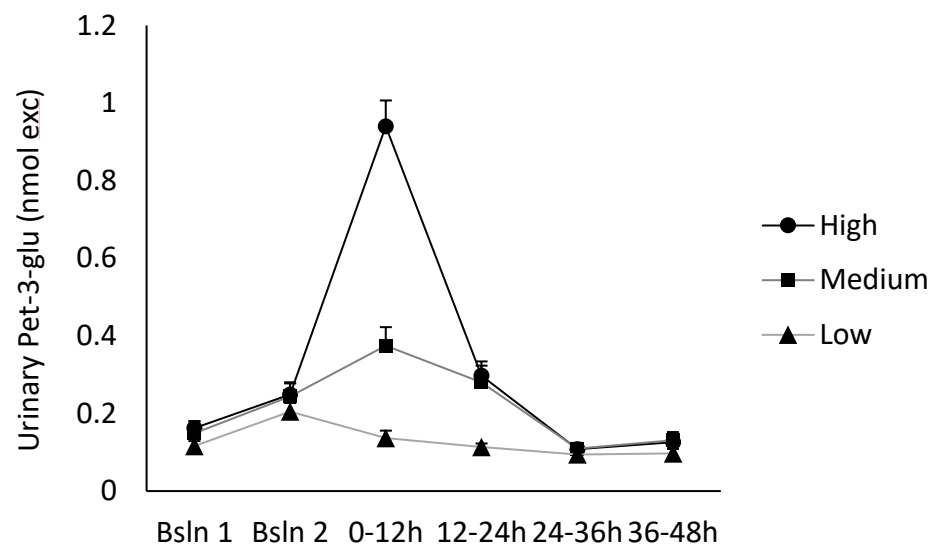

|         | Bsln 1                    | Bsln 2                    | 0-12h                     | 12-24h                    | 24-36h                   | 36-48h                   |
|---------|---------------------------|---------------------------|---------------------------|---------------------------|--------------------------|--------------------------|
| Control | nd                        | nd                        | nd                        | nd                        | nd                       | nd                       |
| Low     | 0.12 ± 0.04 <sup>B</sup>  | 0.2 ± 0.06 <sup>A</sup>   | 0.14 ± 0.05 <sup>cB</sup> | 0.11 ± 0.03 <sup>bB</sup> | 0.09 ± 0.03 <sup>B</sup> | 0.1 ± 0.03 <sup>B</sup>  |
| Medium  | 0.15 ± 0.09 <sup>CD</sup> | 0.24 ± 0.1 <sup>BC</sup>  | 0.37 ± 0.14 <sup>bA</sup> | 0.28 ± 0.15 <sup>aB</sup> | 0.11 ± 0.04 <sup>D</sup> | 0.13 ± 0.06 <sup>D</sup> |
| High    | 0.16 ± 0.05 <sup>CD</sup> | 0.25 ± 0.09 <sup>BC</sup> | 0.94 ± 0.19 <sup>aA</sup> | 0.3 ± 0.07 <sup>aB</sup>  | 0.11 ± 0.02 <sup>D</sup> | 0.13 ± 0.02 <sup>D</sup> |

Figure SI-34 – Urinary excretion of petunidin glucuronide.

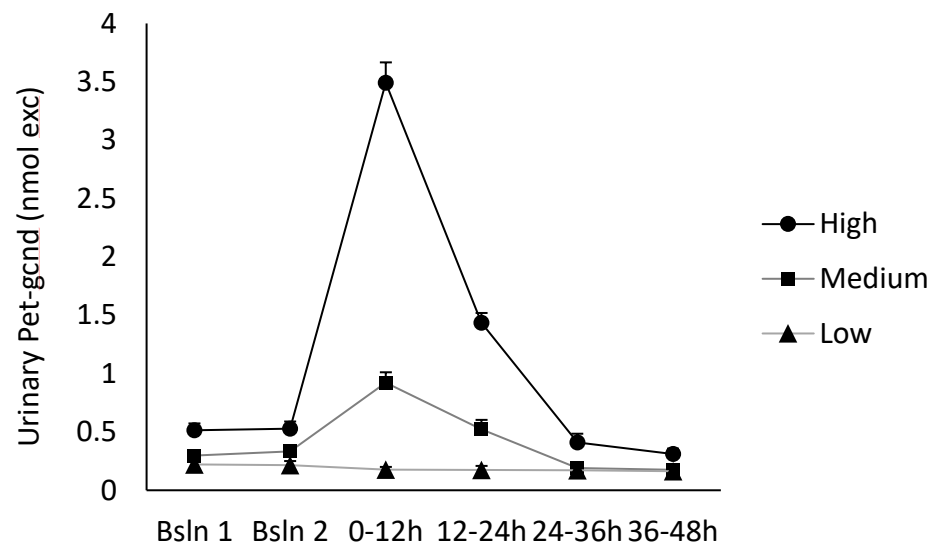

|         | Bsln 1                    | Bsln 2                    | 0-12h                     | 12-24h                    | 24-36h                    | 36-48h                    |
|---------|---------------------------|---------------------------|---------------------------|---------------------------|---------------------------|---------------------------|
| Control | nd                        | nd                        | nd                        | nd                        | nd                        | nd                        |
| Low     | 0.22 ± 0.07 <sup>b</sup>  | 0.22 ± 0.1 <sup>b</sup>   | 0.18 ± 0.06 <sup>c</sup>  | 0.17 ± 0.1 <sup>c</sup>   | 0.17 ± 0.05 <sup>b</sup>  | 0.16 ± 0.12 <sup>b</sup>  |
| Medium  | 0.3 ± 0.1 <sup>bC</sup>   | 0.33 ± 0.14 <sup>bC</sup> | 0.92 ± 0.24 <sup>bA</sup> | 0.52 ± 0.23 <sup>bB</sup> | 0.19 ± 0.08 <sup>bD</sup> | 0.18 ± 0.09 <sup>bD</sup> |
| High    | 0.51 ± 0.16 <sup>aC</sup> | 0.53 ± 0.18 <sup>aC</sup> | 3.49 ± 0.46 <sup>aA</sup> | 1.44 ± 0.2 <sup>aB</sup>  | 0.41 ± 0.2 <sup>aD</sup>  | 0.31 ± 0.12 <sup>aD</sup> |

Figure SI-35 – Urinary excretion of petunidin sulfate.

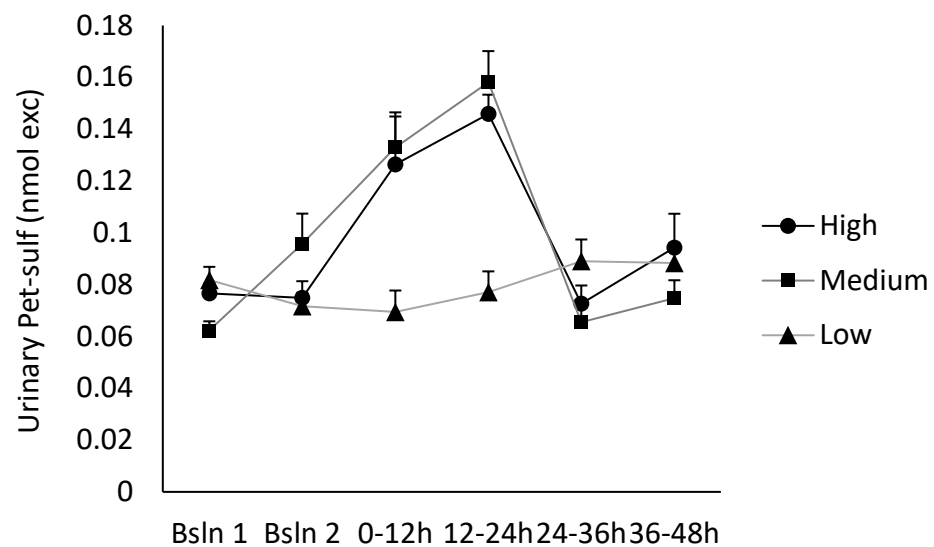

|         | Bsln 1                   | Bsln 2                   | 0-12h                      | 12-24h                    | 24-36h                   | 36-48h                    |
|---------|--------------------------|--------------------------|----------------------------|---------------------------|--------------------------|---------------------------|
| Control | nd                       | nd                       | nd                         | nd                        | nd                       | nd                        |
| Low     | 0.08 ± 0.01              | 0.07 ± 0.01              | 0.07 ± 0.02 <sup>b</sup>   | 0.08 ± 0.02 <sup>b</sup>  | 0.09 ± 0.02              | 0.09 ± 0.02               |
| Medium  | 0.06 ± 0.01 <sup>B</sup> | 0.1 ± 0.03 <sup>B</sup>  | 0.13 ± 0.04 <sup>aA</sup>  | 0.16 ± 0.03 <sup>aA</sup> | 0.07 ± 0.02 <sup>B</sup> | 0.07 ± 0.02 <sup>B</sup>  |
| High    | 0.08 ± 0.01 <sup>C</sup> | 0.07 ± 0.02 <sup>C</sup> | 0.13 ± 0.05 <sup>aAB</sup> | 0.15 ± 0.02 <sup>aA</sup> | 0.07 ± 0.02 <sup>C</sup> | 0.09 ± 0.03 <sup>BC</sup> |

Figure SI-36 – Total urinary excretion of anthocyanins over 48h. Derivatives of A) cyanidin, B) delphinidin, C) malvidin, D) peonidin, E) petunidin. Urinary excretion of anthocyanins occurred in a dose-dependent manner. Cyanidins and malvidins were primarily excreted as parent glycosides (i.e., galactosides and glucosides), while other forms were more commonly excreted as metabolites. Data shown as mean  $\pm$  SEM. Lowercase letters indicate significant differences ( $p < 0.05$ ) between doses; capital letters indicate differences between derivatives.

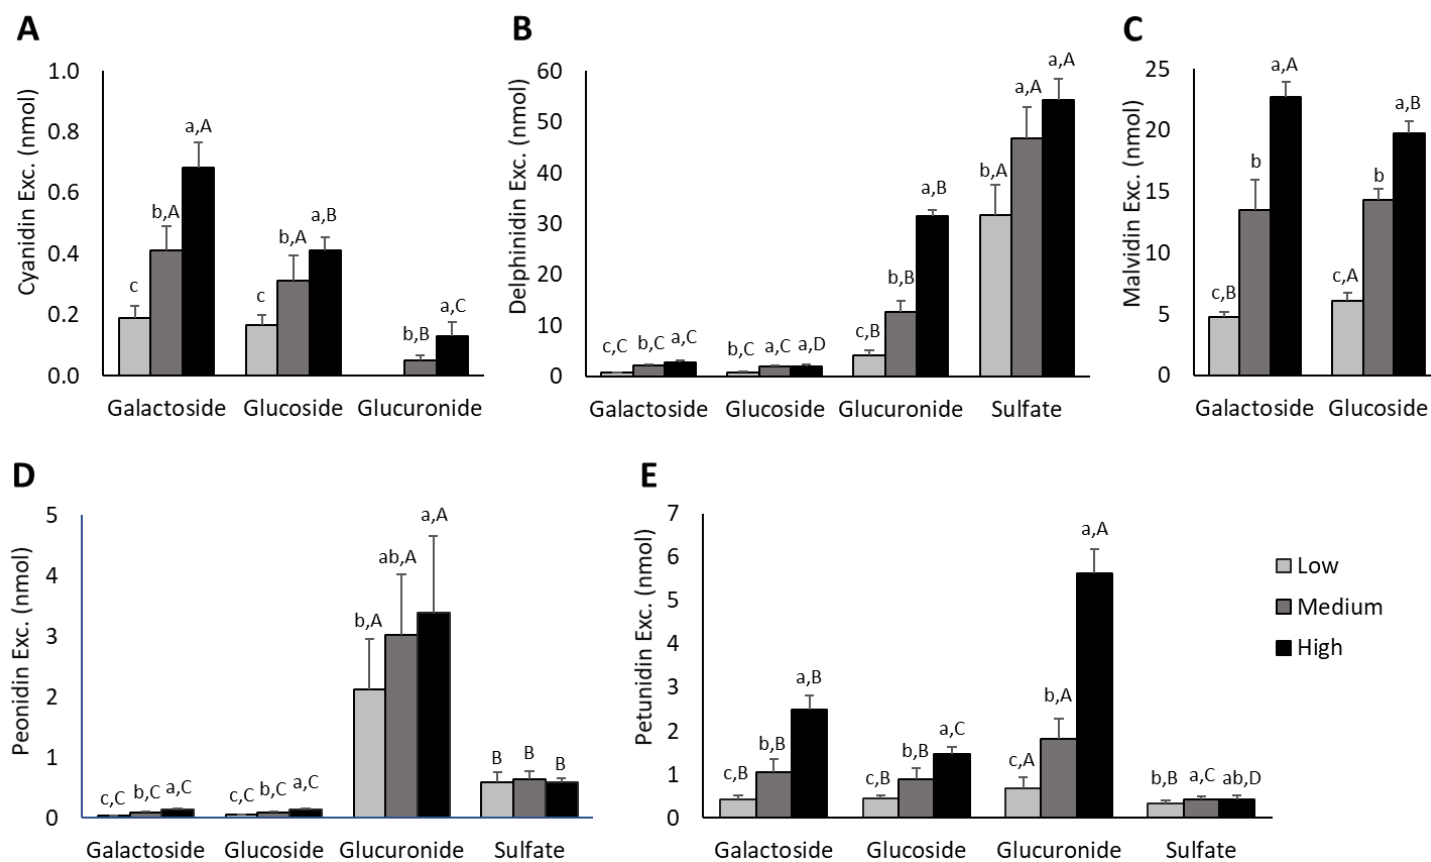



Figure SI-37 – Urinary excretion of hippuric acid.

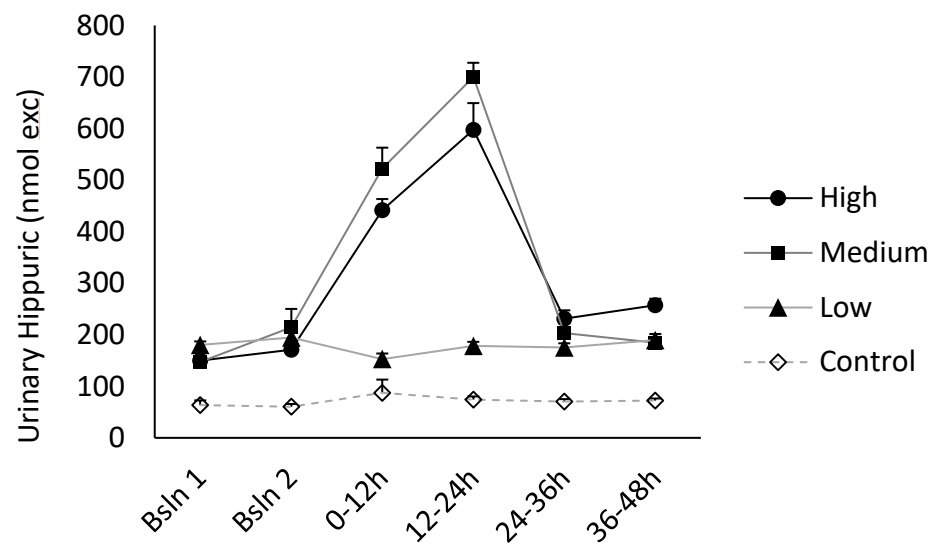

|         | Bsln 1                     | Bsln 2                      | 0-12h                       | 12-24h                      | 24-36h                     | 36-48h                     |
|---------|----------------------------|-----------------------------|-----------------------------|-----------------------------|----------------------------|----------------------------|
| Control | 63.7 ± 25.2 <sup>b</sup>   | 60.3 ± 14.2 <sup>b</sup>    | 87.4 ± 72.5 <sup>c</sup>    | 74.2 ± 17.4 <sup>c</sup>    | 70.7 ± 12.7 <sup>b</sup>   | 72.2 ± 11.8 <sup>b</sup>   |
| Low     | 180.4 ± 18.9 <sup>a</sup>  | 194.6 ± 28.8 <sup>a</sup>   | 152.7 ± 29 <sup>b</sup>     | 178.5 ± 22 <sup>b</sup>     | 175.4 ± 22.6 <sup>a</sup>  | 189.3 ± 34.4 <sup>a</sup>  |
| Medium  | 147.1 ± 33.8 <sup>aB</sup> | 214.7 ± 100.3 <sup>aB</sup> | 522.2 ± 115.1 <sup>aA</sup> | 700.1 ± 77.8 <sup>aA</sup>  | 203.5 ± 51.3 <sup>aB</sup> | 184.9 ± 31 <sup>aB</sup>   |
| High    | 149.9 ± 12.6 <sup>aC</sup> | 170.8 ± 37 <sup>aC</sup>    | 441.6 ± 61.4 <sup>aA</sup>  | 597.7 ± 146.3 <sup>aA</sup> | 231.3 ± 45.4 <sup>aB</sup> | 257.2 ± 33.6 <sup>aB</sup> |

Figure SI-38 – Urinary excretion of 3-hydroxy hippuric acid.

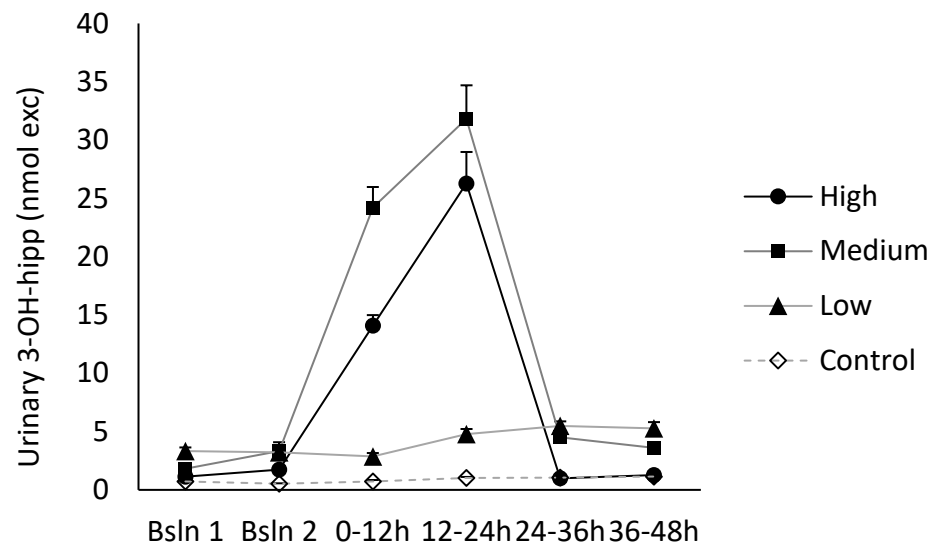

|         | Bsln 1                    | Bsln 2                     | 0-12h                      | 12-24h                      | 24-36h                    | 36-48h                     |
|---------|---------------------------|----------------------------|----------------------------|-----------------------------|---------------------------|----------------------------|
| Control | 0.71 ± 0.2 <sup>cB</sup>  | 0.53 ± 0.1 <sup>cB</sup>   | 0.71 ± 0.38 <sup>dB</sup>  | 1.03 ± 0.22 <sup>cA</sup>   | 1.06 ± 0.39 <sup>bA</sup> | 1.14 ± 0.3 <sup>bA</sup>   |
| Low     | 3.32 ± 0.9 <sup>aBC</sup> | 3.22 ± 0.88 <sup>aBC</sup> | 2.87 ± 0.77 <sup>cC</sup>  | 4.78 ± 1.25 <sup>bABC</sup> | 5.49 ± 1.11 <sup>aA</sup> | 5.29 ± 1.48 <sup>aAB</sup> |
| Medium  | 1.81 ± 0.5 <sup>bC</sup>  | 3.32 ± 2.18 <sup>aBC</sup> | 24.22 ± 4.97 <sup>aA</sup> | 31.82 ± 8.13 <sup>aA</sup>  | 4.52 ± 1.59 <sup>aB</sup> | 3.6 ± 1.07 <sup>aBC</sup>  |
| High    | 1.12 ± 0.24 <sup>bC</sup> | 1.72 ± 0.78 <sup>bC</sup>  | 14.07 ± 2.59 <sup>bB</sup> | 26.28 ± 7.62 <sup>aA</sup>  | 0.99 ± 0.42 <sup>bC</sup> | 1.27 ± 0.68 <sup>bC</sup>  |

Figure SI-39 – Plasma 3-hydroxyphenyl propionic acid.

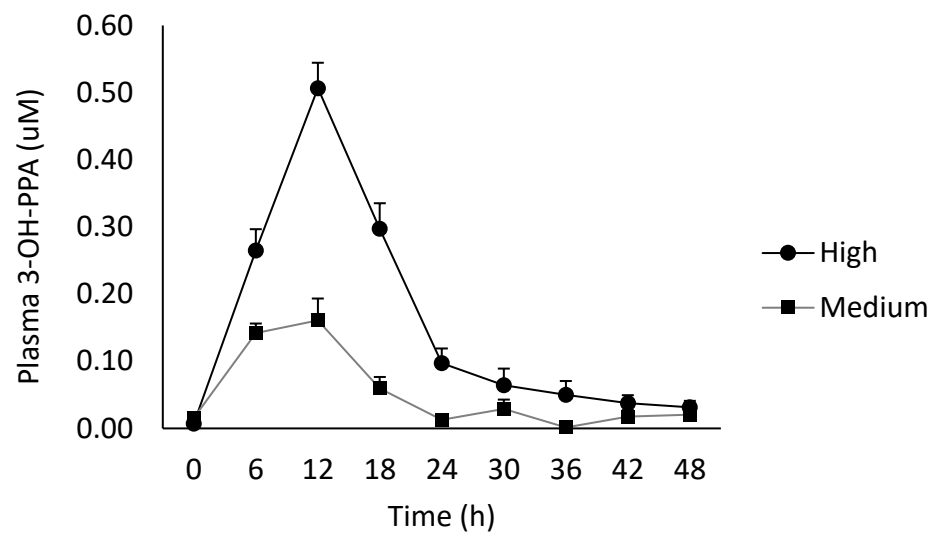

|         | 0h                          | 6h                          | 12h                         | 18h                          | 24h                         | 30h                          | 36h                        | 42h                         | 48h                         |
|---------|-----------------------------|-----------------------------|-----------------------------|------------------------------|-----------------------------|------------------------------|----------------------------|-----------------------------|-----------------------------|
| Control | nd                          | nd                          | nd                          | nd                           | nd                          | nd                           | nd                         | nd                          | nd                          |
| Low     | nd                          | nd                          | nd                          | nd                           | nd                          | nd                           | nd                         | nd                          | nd                          |
| Medium  | 0.007 ± 0.012 <sup>BC</sup> | 0.142 ± 0.037 <sup>bA</sup> | 0.161 ± 0.092 <sup>bA</sup> | 0.05 ± 0.042 <sup>bAB</sup>  | 0.008 ± 0.01 <sup>BC</sup>  | 0.029 ± 0.024 <sup>bAB</sup> | 0.001 ± 0.002 <sup>C</sup> | 0.018 ± 0.019 <sup>BC</sup> | 0.02 ± 0.025 <sup>BC</sup>  |
| High    | 0.004 ± 0.007 <sup>D</sup>  | 0.265 ± 0.09 <sup>aAB</sup> | 0.507 ± 0.107 <sup>aA</sup> | 0.297 ± 0.107 <sup>aAB</sup> | 0.097 ± 0.062 <sup>BC</sup> | 0.065 ± 0.069 <sup>aCD</sup> | 0.05 ± 0.058 <sup>CD</sup> | 0.037 ± 0.034 <sup>CD</sup> | 0.032 ± 0.025 <sup>CD</sup> |

Figure SI-40 – Plasma caffeic acid glucuronide.

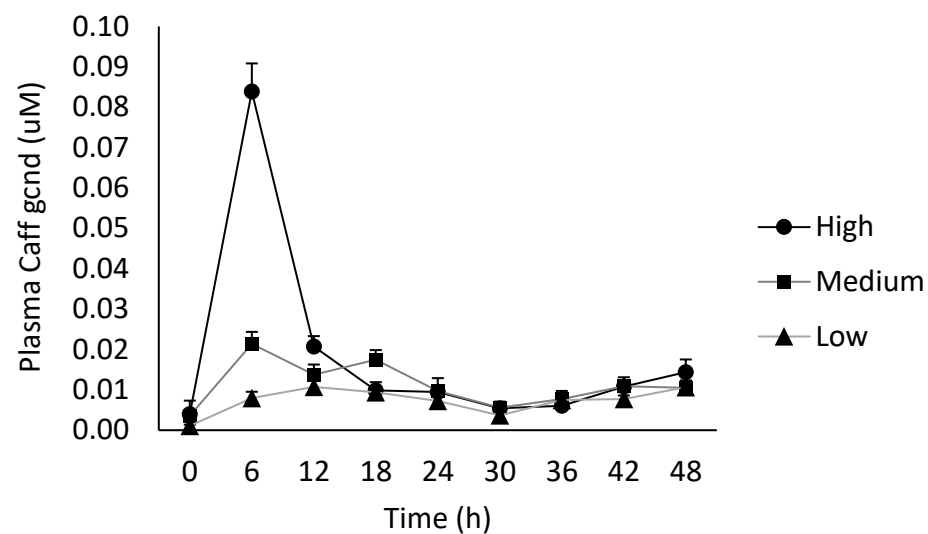

|         | 0h                            | 6h                             | 12h                           | 18h                            | 24h                             | 30h                           | 36h                           | 42h                            | 48h                           |
|---------|-------------------------------|--------------------------------|-------------------------------|--------------------------------|---------------------------------|-------------------------------|-------------------------------|--------------------------------|-------------------------------|
| Control | nd                            | nd                             | nd                            | nd                             | nd                              | nd                            | nd                            | nd                             | nd                            |
| Low     | 0.0003 ± 0.0005 <sup>bb</sup> | 0.0079 ± 0.0039 <sup>cAB</sup> | 0.0107 ± 0.007 <sup>A</sup>   | 0.0094 ± 0.0039 <sup>A</sup>   | 0.0073 ± 0.0036 <sup>A</sup>    | 0.0037 ± 0.0024 <sup>AB</sup> | 0.0075 ± 0.0059 <sup>AB</sup> | 0.0077 ± 0.0024 <sup>A</sup>   | 0.0107 ± 0.0044 <sup>A</sup>  |
| Medium  | 0.0009 ± 0.0018 <sup>ab</sup> | 0.0214 ± 0.0079 <sup>bA</sup>  | 0.0137 ± 0.0072 <sup>AB</sup> | 0.0175 ± 0.0067 <sup>A</sup>   | 0.0097 ± 0.0037 <sup>AB</sup>   | 0.0056 ± 0.0031 <sup>B</sup>  | 0.0077 ± 0.0031 <sup>AB</sup> | 0.0109 ± 0.0042 <sup>AB</sup>  | 0.0105 ± 0.0039 <sup>AB</sup> |
| High    | 0.0015 ± 0.0037 <sup>aE</sup> | 0.0839 ± 0.0197 <sup>aA</sup>  | 0.0207 ± 0.0073 <sup>B</sup>  | 0.0098 ± 0.0059 <sup>BCD</sup> | 0.0095 ± 0.0096 <sup>BCDE</sup> | 0.0054 ± 0.0044 <sup>DE</sup> | 0.006 ± 0.0031 <sup>CDE</sup> | 0.0109 ± 0.0064 <sup>BCD</sup> | 0.0143 ± 0.0084 <sup>BC</sup> |

Figure SI-41 – Plasma ferulic acid glucuronide.

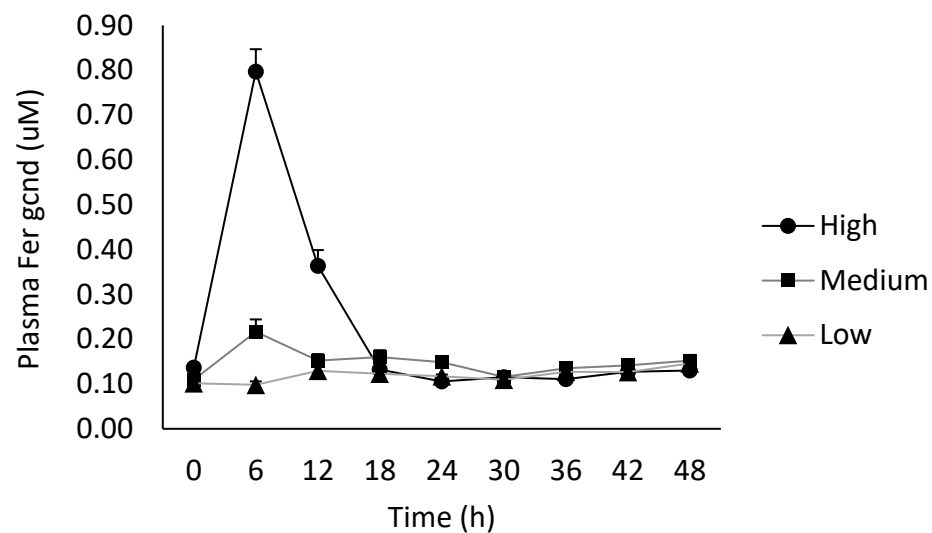

|         | 0h                         | 6h                        | 12h                        | 18h                      | 24h                        | 30h                       | 36h                        | 42h                        | 48h                        |
|---------|----------------------------|---------------------------|----------------------------|--------------------------|----------------------------|---------------------------|----------------------------|----------------------------|----------------------------|
| Control | nd                         | nd                        | nd                         | nd                       | nd                         | nd                        | nd                         | nd                         | nd                         |
| Low     | 0.1 ± 0.02 <sup>b</sup>    | 0.1 ± 0.02 <sup>c</sup>   | 0.13 ± 0.04 <sup>b</sup>   | 0.12 ± 0.01              | 0.12 ± 0.01 <sup>ab</sup>  | 0.11 ± 0.02               | 0.13 ± 0.02                | 0.13 ± 0.02                | 0.15 ± 0.03                |
| Medium  | 0.11 ± 0.02 <sup>abD</sup> | 0.22 ± 0.07 <sup>bA</sup> | 0.15 ± 0.04 <sup>bBC</sup> | 0.16 ± 0.04 <sup>B</sup> | 0.15 ± 0.04 <sup>bBC</sup> | 0.12 ± 0.02 <sup>CD</sup> | 0.14 ± 0.02 <sup>BCD</sup> | 0.14 ± 0.02 <sup>BCD</sup> | 0.15 ± 0.03 <sup>BCD</sup> |
| High    | 0.14 ± 0.03 <sup>aC</sup>  | 0.8 ± 0.14 <sup>aA</sup>  | 0.36 ± 0.1 <sup>aB</sup>   | 0.13 ± 0.03 <sup>C</sup> | 0.11 ± 0.01 <sup>aC</sup>  | 0.11 ± 0.03 <sup>C</sup>  | 0.11 ± 0.02 <sup>C</sup>   | 0.13 ± 0.02 <sup>C</sup>   | 0.13 ± 0.03 <sup>C</sup>   |

Figure SI-42 – Plasma ferulic acid sulfate.

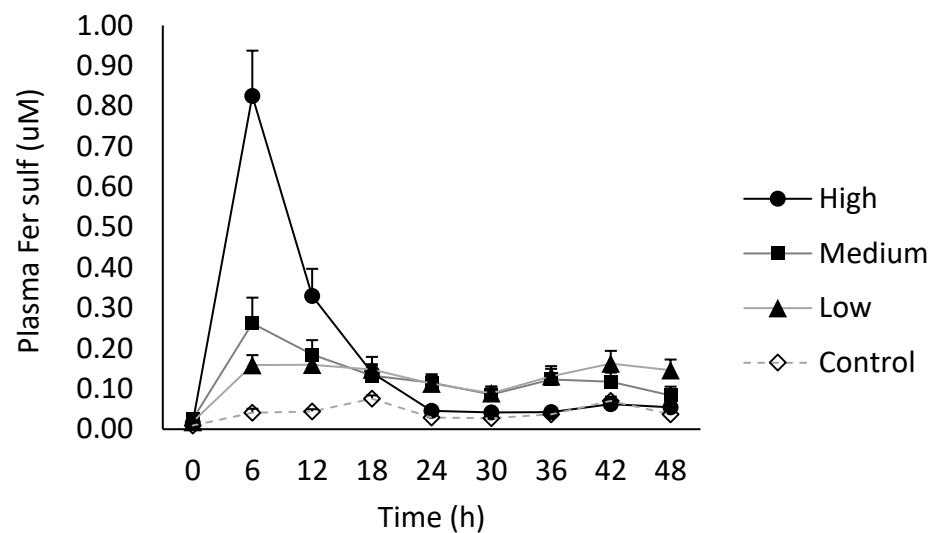

|         | 0h                         | 6h                           | 12h                          | 18h                        | 24h                           | 30h                          | 36h                           | 42h                         | 48h                           |
|---------|----------------------------|------------------------------|------------------------------|----------------------------|-------------------------------|------------------------------|-------------------------------|-----------------------------|-------------------------------|
| Control | 0.007 ± 0.009 <sup>C</sup> | 0.041 ± 0.026 <sup>cAB</sup> | 0.044 ± 0.015 <sup>baB</sup> | 0.075 ± 0.022 <sup>A</sup> | 0.029 ± 0.028 <sup>bb</sup>   | 0.027 ± 0.031 <sup>cBC</sup> | 0.037 ± 0.02 <sup>cAB</sup>   | 0.07 ± 0.03 <sup>A</sup>    | 0.037 ± 0.019 <sup>baB</sup>  |
| Low     | 0.013 ± 0.013 <sup>B</sup> | 0.159 ± 0.061 <sup>ba</sup>  | 0.159 ± 0.032 <sup>aA</sup>  | 0.148 ± 0.034 <sup>A</sup> | 0.113 ± 0.051 <sup>aA</sup>   | 0.089 ± 0.044 <sup>aA</sup>  | 0.131 ± 0.066 <sup>aA</sup>   | 0.162 ± 0.084 <sup>A</sup>  | 0.146 ± 0.066 <sup>aA</sup>   |
| Medium  | 0.015 ± 0.023 <sup>B</sup> | 0.262 ± 0.169 <sup>ba</sup>  | 0.185 ± 0.102 <sup>aA</sup>  | 0.133 ± 0.071 <sup>A</sup> | 0.116 ± 0.058 <sup>aA</sup>   | 0.086 ± 0.055 <sup>abA</sup> | 0.123 ± 0.071 <sup>abA</sup>  | 0.117 ± 0.064 <sup>A</sup>  | 0.083 ± 0.058 <sup>abAB</sup> |
| High    | 0.011 ± 0.02 <sup>E</sup>  | 0.825 ± 0.317 <sup>aA</sup>  | 0.33 ± 0.19 <sup>aAB</sup>   | 0.14 ± 0.111 <sup>BC</sup> | 0.046 ± 0.027 <sup>abCD</sup> | 0.042 ± 0.027 <sup>bcD</sup> | 0.042 ± 0.029 <sup>bcCD</sup> | 0.062 ± 0.017 <sup>CD</sup> | 0.054 ± 0.032 <sup>bcD</sup>  |

Figure SI-43 – Plasma hippuric acid.

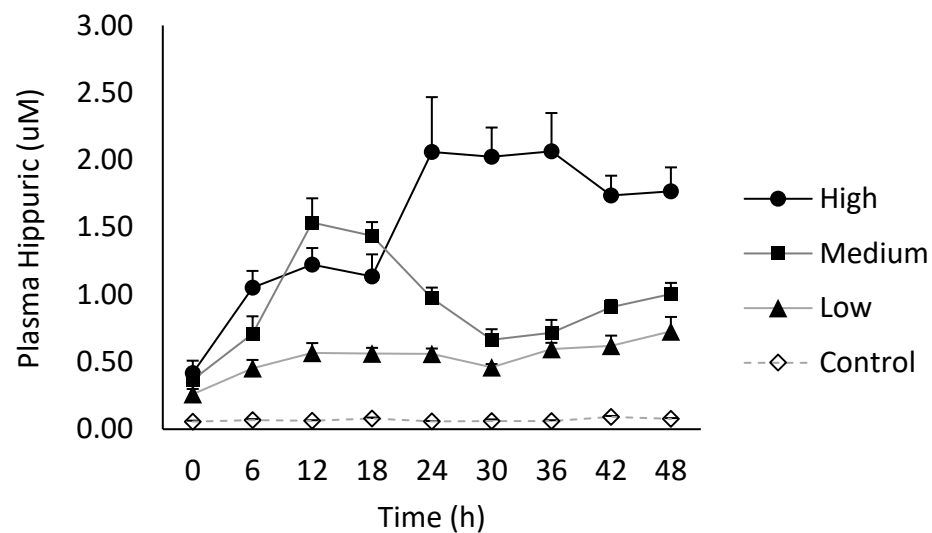

|         | 0h                        | 6h                         | 12h                        | 18h                       | 24h                        | 30h                        | 36h                       | 42h                        | 48h                        |
|---------|---------------------------|----------------------------|----------------------------|---------------------------|----------------------------|----------------------------|---------------------------|----------------------------|----------------------------|
| Control | 0.06 ± 0.02 <sup>b</sup>  | 0.07 ± 0.02 <sup>c</sup>   | 0.06 ± 0.01 <sup>c</sup>   | 0.08 ± 0.02 <sup>c</sup>  | 0.06 ± 0.01 <sup>d</sup>   | 0.06 ± 0.03 <sup>c</sup>   | 0.06 ± 0.02 <sup>c</sup>  | 0.09 ± 0.02 <sup>c</sup>   | 0.08 ± 0.02 <sup>c</sup>   |
| Low     | 0.26 ± 0.1 <sup>aB</sup>  | 0.45 ± 0.15 <sup>bAB</sup> | 0.57 ± 0.18 <sup>bA</sup>  | 0.56 ± 0.11 <sup>bA</sup> | 0.56 ± 0.11 <sup>cA</sup>  | 0.46 ± 0.07 <sup>bA</sup>  | 0.6 ± 0.12 <sup>bA</sup>  | 0.62 ± 0.2 <sup>bA</sup>   | 0.73 ± 0.28 <sup>bA</sup>  |
| Medium  | 0.37 ± 0.18 <sup>aC</sup> | 0.71 ± 0.34 <sup>abB</sup> | 1.54 ± 0.51 <sup>aA</sup>  | 1.44 ± 0.29 <sup>aA</sup> | 0.97 ± 0.23 <sup>bAB</sup> | 0.67 ± 0.22 <sup>bB</sup>  | 0.72 ± 0.27 <sup>bB</sup> | 0.91 ± 0.15 <sup>bAB</sup> | 1.00 ± 0.22 <sup>bAB</sup> |
| High    | 0.42 ± 0.26 <sup>aC</sup> | 1.05 ± 0.35 <sup>aB</sup>  | 1.22 ± 0.35 <sup>aAB</sup> | 1.14 ± 0.46 <sup>aB</sup> | 2.06 ± 1.15 <sup>aAB</sup> | 2.02 ± 0.61 <sup>aAB</sup> | 2.06 ± 0.81 <sup>aA</sup> | 1.74 ± 0.41 <sup>aAB</sup> | 1.77 ± 0.5 <sup>aAB</sup>  |

Figure SI-44 – Plasma quercetin glucuronide.

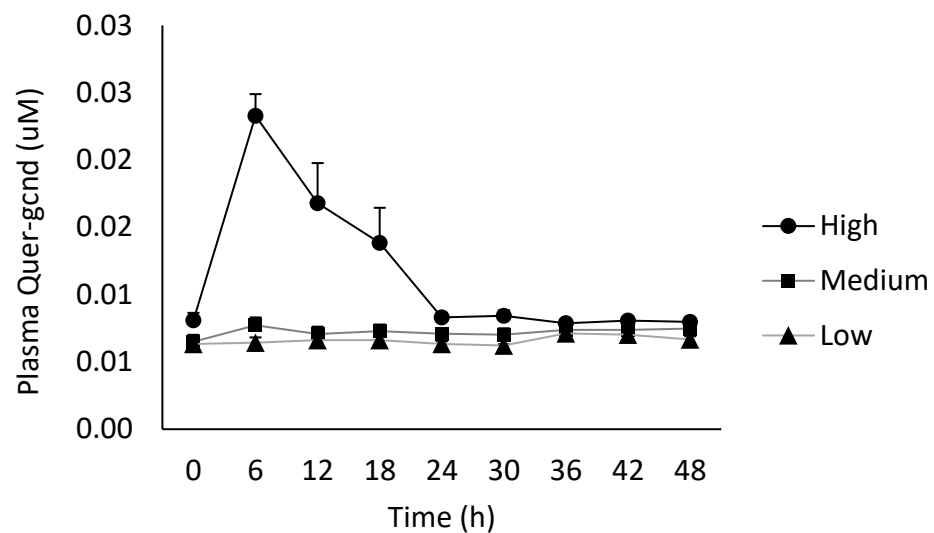

|         | 0h                           | 6h                            | 12h                           | 18h                            | 24h                            | 30h                          | 36h                          | 42h                          | 48h                         |
|---------|------------------------------|-------------------------------|-------------------------------|--------------------------------|--------------------------------|------------------------------|------------------------------|------------------------------|-----------------------------|
| Control | nd                           | nd                            | nd                            | nd                             | nd                             | nd                           | nd                           | nd                           | nd                          |
| Low     | 0.0063 ± 0.0006              | 0.0064 ± 0.0008 <sup>b</sup>  | 0.0066 ± 0.0004 <sup>b</sup>  | 0.0066 ± 0.0004 <sup>b</sup>   | 0.0063 ± 0.0004 <sup>b</sup>   | 0.0062 ± 0.0002              | 0.0071 ± 0.0008              | 0.007 ± 0.0009               | 0.0067 ± 0.0005             |
| Medium  | 0.0057 ± 0.0026              | 0.0077 ± 0.0015 <sup>b</sup>  | 0.0071 ± 0.0016 <sup>b</sup>  | 0.0073 ± 0.0014 <sup>b</sup>   | 0.0071 ± 0.0011 <sup>b</sup>   | 0.007 ± 0.0014               | 0.0074 ± 0.0012              | 0.0074 ± 0.0015              | 0.0075 ± 0.0018             |
| High    | 0.0061 ± 0.0039 <sup>D</sup> | 0.0233 ± 0.0046 <sup>AA</sup> | 0.0168 ± 0.0084 <sup>AB</sup> | 0.0138 ± 0.0074 <sup>ABC</sup> | 0.0083 ± 0.0009 <sup>ACD</sup> | 0.0084 ± 0.0012 <sup>D</sup> | 0.0079 ± 0.0005 <sup>D</sup> | 0.0081 ± 0.0004 <sup>D</sup> | 0.008 ± 0.0003 <sup>D</sup> |



Figure SI-45 – Plasma methyl-quercetin glucuronide.

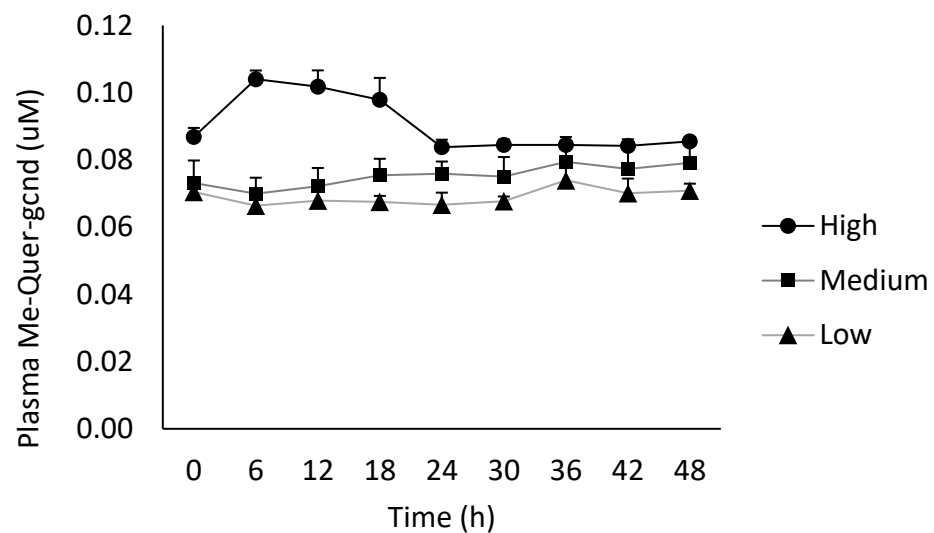

|         | 0h                          | 6h                          | 12h                          | 18h                           | 24h                           | 30h                          | 36h                        | 42h                        | 48h                        |
|---------|-----------------------------|-----------------------------|------------------------------|-------------------------------|-------------------------------|------------------------------|----------------------------|----------------------------|----------------------------|
| Control | nd                          | nd                          | nd                           | nd                            | nd                            | nd                           | nd                         | nd                         | nd                         |
| Low     | 0.053 ± 0.036 <sup>b</sup>  | 0.066 ± 0.007 <sup>b</sup>  | 0.068 ± 0.008 <sup>b</sup>   | 0.067 ± 0.004 <sup>b</sup>    | 0.067 ± 0.007 <sup>b</sup>    | 0.068 ± 0.003 <sup>b</sup>   | 0.074 ± 0.009              | 0.07 ± 0.01                | 0.071 ± 0.005              |
| Medium  | 0.055 ± 0.037 <sup>b</sup>  | 0.07 ± 0.013 <sup>b</sup>   | 0.072 ± 0.015 <sup>b</sup>   | 0.075 ± 0.014 <sup>b</sup>    | 0.076 ± 0.01 <sup>ab</sup>    | 0.075 ± 0.016 <sup>ab</sup>  | 0.079 ± 0.015              | 0.077 ± 0.018              | 0.079 ± 0.018              |
| High    | 0.087 ± 0.008 <sup>aC</sup> | 0.104 ± 0.007 <sup>aA</sup> | 0.102 ± 0.014 <sup>aAB</sup> | 0.098 ± 0.018 <sup>aABC</sup> | 0.084 ± 0.006 <sup>aABC</sup> | 0.084 ± 0.004 <sup>abC</sup> | 0.084 ± 0.007 <sup>c</sup> | 0.084 ± 0.005 <sup>c</sup> | 0.086 ± 0.003 <sup>c</sup> |
